# Supplementary material
Source: PubMed Central journal article supplement (PMC5790029)
Supplement: TBISCI_Family_Intervention_Spanish.pdf [file TBISCI_Family_Intervention_Spanish.pdf]

---

---

# INTERVENCIÓN PARA FAMILIAS DE PACIENTES CON LESIÓN MEDULAR/ TRAUMATISMO CRANEOENCEFÁLICO

**Tara Lehan, PhD**  
Office of Assessment and  
Institutional Research  
Northcentral University  
Prescott Valley, Arizona, USA

**Lillian Flores Stevens, PhD**  
Hunter Holmes McGuire VA  
Medical Center  
Richmond, VA, USA

**Juan Carlos Arango-Lasprilla, PhD**  
IKERBASQUE. Basque Foundation  
for Science  
Bilbao, Spain

## Resumen de la intervención de la familia

### Propósito de la intervención

Esta intervención está diseñada para las familias de pacientes con Lesión Medular y/o Traumatismo Craneoencefálico (LM/TCE). En términos generales, el propósito es mejorar el funcionamiento individual y familiar, y en particular ayudar a los participantes a (1) compartir sus ideas y experiencias en relación a la LM/TCE para mejorar el entendimiento mutuo y construir un consenso familiar, (2) superar las ideas erróneas que puedan albergar sobre la LM/TCE, (3) cambiar la perspectiva de lo negativo a los aspectos positivos de su situación, (4) reconocer el impacto que sus pensamientos tienen en sus emociones, (5) identificar los “signos de alerta” que indican una escalada emocional y aprender a manejar sus emociones, (6) comunicarse de manera efectiva y (7) entender la importancia de los límites dentro de la familia y aprender a ponerlos en claro.

La intención es que a través de esta intervención las familias logren una mejoría en el funcionamiento individual y familiar en áreas tales como la comunicación interpersonal, la adaptación y cohesión familiar, la estabilidad y satisfacción relacional, los límites interpersonales, como también una reducción en los niveles de depresión, ansiedad, agobio, conflicto y el uso de servicios de salud.

Esta intervención fue originalmente creada para ser utilizada con familias Latinoamericanas de habla hispana. Por lo tanto, los ejemplos y los mitos están basados en experiencias de profesionales Latinoamericanos que trabajan con personas con LM/TCE y sus familias. En caso de que esta intervención se quiera utilizar con familias de otras culturas, es necesario realizar algunas adaptaciones culturales.

### Formato de la intervención

Consiste en 8 sesiones de 90 minutos cada una, una vez a la semana. Cada sesión se centra en un tema o una habilidad diferente y los participantes deberán practicar en la vida diaria las nuevas habilidades. A continuación se resumen los temas de cada sesión:

1. Introducción: Explicación del tratamiento, firma del consentimiento para participar en el estudio y administración de los cuestionarios de línea base.
2. Expresar la importancia de la psicoeducación en la LM/TCE.
3. Cambiando de foco: relación que existe entre los pensamientos, los sentimientos y el comportamiento.
4. Control de emociones.
5. Comunicación efectiva.
6. Solución de problemas.
7. Establecimiento de límites.
8. Cierre y fin del tratamiento: resumen de las habilidades aprendidas, aplicación de los cuestionarios posteriores a la intervención.

Cada sesión tiene la misma estructura. Al principio de cada sesión se analiza una frase pertinente al tema de esa semana. Después, se

evalúa el progreso en las tareas prácticas. Gran parte de la sesión se dedica a aprender la información básica del tema, practicar nuevas técnicas y aplicar esas técnicas para superar los retos a los que se enfrenta cada familia en particular. El manual ofrece varios apartados de texto en cursiva donde se muestra al terapeuta cómo abordar y explicar los temas y técnicas que se van a aplicar en la sesión. Se provee de folletos y hojas de trabajo. Cada sesión finaliza con la asignación de tareas prácticas para ser realizadas en casa.

### **Antecedentes**

De acuerdo con McDaniel, Hepworth y Doherty (1992), la enfermedad y la discapacidad se comprenden mejor como el resultado de una compleja interacción de factores genéticos, del desarrollo, psicológicos y culturales; por lo tanto, trabajar con la familia debería ser una parte importante del tratamiento. Sin embargo, muchos profesionales de la salud que están trabajando con las familias que tienen un integrante con LM/TCE no están seguros de cuál sería la manera más efectiva de intervenir para mejorar el funcionamiento de todos los miembros de la familia y el del conjunto de la familia (Stejskal, 2012).

La LM/TCE es una experiencia que afecta a toda la familia. Es decir, que influye y a su vez está influenciada por cada miembro de la familia, sin mencionar a otras personas. Además, cambia la dinámica y los aspectos del sistema familiar, incluyendo los roles, los límites y la comunicación. Es común que las familias experimenten una gran variedad de necesidades durante este período de crisis tales como necesidades de apoyo informativo, emocional y práctico. Dado que generalmente se efectúa una focalización hacia el estado físico o cognitivo del paciente, es posible que las necesidades de la familia pasen desapercibidas o no sean reconocidas.

Según McDaniel et al (1992), las enfermedades graves y crónicas como la LM/TCE pueden actuar como una lupa en la familia, donde todo se exagera. Como resultado de ello, los problemas que afronta una familia en su desarrollo normal pueden volverse patológicos. Por esta razón, es útil evaluar, formular e implementar un plan de cuidados tanto para la familia como para el paciente.

Dado que los miembros de la familia tienen un rol preponderante en el proceso de recuperación del paciente, es crucial reconocer el alcance de la experiencia de la LM/TCE y proveer los cuidados adecuados dentro del contexto del sistema familiar (Stejskal, 2012).

El objetivo de esta intervención es abordar las necesidades de las familias de personas con LM/TCE. Esta intervención se basa en trabajos clínicos e investigaciones previas que han sido realizadas en estas familias y la intención es que los temas tratados y las estrategias descritas ayuden a los participantes a superar los retos asociados a la LM/TCE y a reconocer los cambios positivos asociados a la LM/TCE. En última instancia, la finalidad es que las familias que se enfrentan a una LM/TCE puedan establecer una nueva norma de convivencia que permita prosperar a cada miembro en particular y a la familia como un todo.

Se han integrado estrategias de varios modelos de terapia de pareja, de familia y de psicología, incluyendo terapia estructural de familia, terapia narrativa, terapia enfocada en las soluciones y terapia cognitivo-conductual para crear una secuencia de sesiones que tienen componentes educacionales y prácticos relacionados con experiencias comunes referidas por los familiares que se enfrentan a una LM/TCE.

A pesar de que la intervención se encuentra en formato de manual, brinda el espacio para que las familias puedan tratar los problemas específicos que están enfrentando. Es decir, que aunque el proceso ha sido estandarizado, el contenido puede variar para asegurar que la intervención sea lo más útil posible para la familia.

### **¿Quiénes son los más adecuados para recibir esta intervención?**

Este tratamiento está diseñado para el individuo con LM/TCE y por lo menos un miembro de la familia que esté presente en cada sesión.

No existe un límite para la cantidad de miembros de la familia que puedan ser parte del tratamiento, no obstante, se recomienda un grupo de hasta cinco miembros de la familia para que cada uno tenga la oportunidad de participar activamente.

| Estrategias                   | Instrumentos                                                                                                           |
|-------------------------------|------------------------------------------------------------------------------------------------------------------------|
| Construcción de significado   | Sentido de coherencia<br>Cuestionario de Cognición de enfermedad                                                       |
| Reformulación de Pensamientos | Cuestionario de la Salud del Paciente PHQ-9<br>Cuestionario de Ansiedad generalizada (GAD-7)                           |
| Manejo de emociones           | Escala de reactividad emocional<br>Escala emocional del SCORE 15                                                       |
| Comunicación                  | Escala de la comunicación familiar<br>Subescala de comunicación SCORE 15                                               |
| Solución de problemas         | Índice de solución de problemas personales.                                                                            |
| Límites                       | Escala IV de evaluación de adaptabilidad y cohesión familiar.                                                          |
| La diferenciación del YO      | Inventario de la diferenciación del YO<br>Escala de sobrecarga del cuidador de Zarit (para los miembros de la familia) |
| Misceláneas*                  | Escala de auto percepción de carga de cuidado (para el paciente)<br>SCORE 15                                           |

*\*Se incluyen estas últimas medidas misceláneas porque se espera que una mejoría en las áreas enfocadas en la intervención resultará en una disminución de la sobrecarga y un aumento en las estrategias de afrontamiento*

Se alienta a que los mismos miembros de la familia participen sistemáticamente y asistan a todas las sesiones.

Los requerimientos para los pacientes con LM/TCE deben ser: (1) tener un diagnóstico médico comprobado mediante historia clínica o pruebas de neuroimágenes de haber sufrido una LM/TCE, (2) que tengan entre 18 y 65 años de edad, (3) haber transcurrido entre 6 meses y 3 años desde la LM/TCE, (4) estar en un nivel 8 en la escala “Rancho los Amigos”, (5) tener un estado cognitivo y de orientación adecuado para obtener un mejor beneficio de la intervención (ej. una calificación de 23 o más en el examen de estado mental Mini Mental), (6) saber leer y escribir, y (7) no presentar amnesia post traumática al momento del tratamiento.

Los miembros de la familia pueden tener lazos sanguíneos o de matrimonio y/o ser amigos íntimos del paciente con LM/TCE. Además, pueden incluir personas que (1) conviven con el paciente con LM/TCE (2) que tengan entre 18 y 65 años de edad, y (3) puedan leer y escribir.

#### ¿Quiénes NO son indicados para esta intervención?

Este tratamiento **no** está indicado para los sobrevivientes de LM/TCE o los miembros de la familia que poseen historia de enfermedades

psiquiátricas o neurológicas, o que en la actualidad tengan discapacidad cognitiva y/o diagnóstico de abuso de sustancias.

Los pacientes con LM/TCE que padezcan afasia y aquellas familias de pacientes con LM/TCE donde haya otros miembros de la familia que necesitan de cuidados especiales (ej. otros miembros de la familia con demencia o enfermedades clínicas que requieran supervisión médica) no son apropiados para esta intervención.

#### ¿Cómo saber si esta intervención está funcionando?

Para determinar la utilidad de la intervención, se administrarán varias herramientas psicométricas a los participantes antes y después de la misma. La tabla que se muestra arriba incluye una lista de medidas para evaluar la evolución en las áreas específicas de la intervención.

Para examinar la eficacia de esta intervención, se obtendrá información relacionada con las características sociodemográficas del paciente y la familia, información sobre la composición familiar y finalmente se administrará una batería de pruebas de funcionamiento psicosocial (ver arriba) antes de comenzar la intervención (Línea base), al finalizar la intervención y a los seis meses después de terminar el programa de intervención.

---

**REFERENCIAS**

---

1. McDaniel SH, Hepworth J, Doherty WJ. *Medical Family Therapy: A Biopsychosocial Approach to Families with Health Problems*. New York: Basic Books; 1992.
2. Stejskal TM. Removing barriers to rehabilitation: Theory-based family intervention in community settings after brain injury. *NeuroRehabilitation*. 2011;31(1):75-83.

## Sesión Uno

### Materiales

- ✓ Cuestionario de línea de base.
- ✓ Bolígrafos.

### Resumen

En la primera sesión se le presenta el tratamiento a la familia. Se explica el propósito de la intervención, se esboza la estructura de las sesiones y se hace una revisión de las pautas y expectativas. Se les da la oportunidad de realizar preguntas y se aclaran las dudas que puedan surgir. Una vez que todas las personas acepten participar en la intervención, se determina el horario de cada una de las sesiones y los miembros de la familia deberán completar los cuestionarios de línea base. Al terminar la sesión, se les asigna una tarea a los participantes: para la siguiente sesión cada miembro de la familia deberá traer un objeto que mejor represente su experiencia con la LM/TCE.

### Índice de plan de trabajo

| Contenido                                      | Duración Sugerida<br>(Total 90 minutos) |
|------------------------------------------------|-----------------------------------------|
| 1. Bienvenida y resumen                        | 5 minutos                               |
| 2. Pautas y expectativas                       | 10 minutos                              |
| 3. Consentimiento y cuestionario de línea base | 70 minutos                              |
| 4. Asignación de la tarea                      | 5 minutos                               |

### Revisión de expectativas y lectura de la frase (5 minutos)

#### 1. Bienvenida e información general (5 minutos)

*Diga:* “Comenzaremos esta sesión explicando algunos conceptos en los que está basada esta terapia:

- *La enfermedad y la discapacidad se entienden mejor si se consideran como el resultado de una interacción compleja donde intervienen factores genéticos, de desarrollo, psicológicos y culturales, por lo tanto, el trabajo en familia debe ser una parte importante de cualquier enfoque terapéutico.*

- *Las enfermedades graves y crónicas pueden actuar como una lupa en la familia. Según los terapeutas familiares Susan McDaniel, Jeri Hepworth y William Doherty, todo se exagera, dado que las soluciones que habitualmente se aplican a los problemas que enfrentan las familias en un proceso de desarrollo normal pueden ser infructuosas en estos casos.*
- *La LM/TCE es una experiencia que atañe a toda la familia, influyendo y siendo influenciada por cada miembro de la misma, por no mencionar a otros individuos.*
- *Cada individuo de la familia experimenta una gran cantidad de necesidades durante este período de crisis, mostrando frecuentemente necesidades de recibir información y de recibir apoyo emocional y práctico.*
- *Debido a que la atención está enfocada en el estado físico o cognitivo del paciente, las necesidades de los otros miembros de la familia y de la familia como un todo muchas veces pasan desapercibidas.*
- *Por esta razón es útil asesorar, formular e implementar un plan de cuidado tanto para la familia como para el paciente. Considerando que los miembros de la familia juegan un rol muy importante en el proceso de recuperación del paciente, es crucial reconocer el alcance de la experiencia de la LM/TCE y procurar los cuidados dentro del contexto familiar.*

El propósito de esta intervención sobre la familia es evaluar las necesidades tanto de los individuos que configuran la familia que se enfrenta a la LM/TCE, como también a la familia como un todo y promover un funcionamiento saludable individual y familiar.

Basado en investigaciones realizadas en familias que tienen las mismas características que las suyas, nuestro objetivo es que los temas tratados y las estrategias descritas ayuden a su familia a superar los obstáculos asociados a la LM/TCE y reconocer los cambios positivos asociados al mismo.

Finalmente, nuestro deseo es que su familia pueda establecer una nueva manera de relacionarse que permita a cada miembro y la familia como un todo desarrollarse saludablemente.

Esta intervención está diseñada para ayudar a los participantes a (1) compartir sus ideas y experiencias relacionadas con la LM/TCE para mejorar el mutuo entendimiento y construir consenso familiar, (2) aclarar conceptos erróneos sobre la LM/TCE, (3) cambiar el enfoque de los aspectos negativos a los positivos de la situación, (4) reconocer el impacto que sus pensamientos tienen en sus sentimientos, (5) identificar las “señales de alerta” que indican una escalada emocional y cómo controlar sus emociones, (6) comunicarse con eficacia y (7) entender la importancia de establecer límites claros en la familia.

Se cree que mejorando el funcionamiento individual y familiar, no sólo experimentaréis una disminución en el nivel de depresión, sobrecarga del cuidador, ansiedad y problemas de salud, sino también un aumento en la estabilidad y satisfacción relacional, una mejora en los límites y comunicación interpersonal, satisfacción con la vida y así, mejorar su calidad de vida.

Esta intervención consta de 8 sesiones de 90 minutos cada una. Cada sesión se enfoca en un tema o destreza diferente. Además, deberéis practicar las nuevas habilidades en vuestros hogares.

A continuación se muestra un resumen de cada tema de la sesión.

Cada sesión tiene la misma estructura. Al principio se discute una frase pertinente al tema de esa semana. Después, se revisa el progreso en las tareas de práctica en el hogar.

La mayor parte de cada sesión se dedica al aprendizaje de información sobre el tema, practicando técnicas nuevas y poniéndolas en práctica para superar los desafíos que enfrenta la

familia. Igualmente, se suministrarán folletos y hojas de trabajo durante cada una de las sesiones. Cada sesión finaliza con la tarea práctica entre sesiones para realizar en el hogar.”

## **2. Debate de las pautas y el compromiso de los participantes y el facilitador (5 minutos)**

Prosigas: “Ahora, quisiera hablar sobre el compromiso y el proceso de estas sesiones. Trabajaré para crear un entorno seguro donde cada uno se sienta cómodo para compartir sus pensamientos y sentimientos.

Aunque es normal la divergencia, nuestro objetivo es trabajar para aumentar el entendimiento mutuo entre los miembros de la familia. Creo que la experiencia y opinión de cada uno de ustedes tiene el mismo valor.

Por lo tanto, he creado pautas que me gustaría discutir exhaustivamente con ustedes.”

Entregue una copia del contrato a cada miembro de la familia y exponga el compromiso del facilitador. Explique: “Firmando la parte inferior de esta hoja de trabajo, yo estoy indicando mi voluntad para cumplir con el compromiso.” Lea cada una de las pautas del compromiso para los participantes.

Señale: “Al firmar el contrato de compromiso, usted está manifestando su voluntad de cumplir con cada una de las pautas del compromiso. Si observo que las mismas no se cumplen o se pueden mejorar, simplemente extenderé mi mano y les pediré silencio. Entonces, según lo crea conveniente, les daré una retroalimentación y sugeriré maneras más útiles y apropiadas de interactuar. También puedo tomar notas de vez en cuando para estar seguro de captar sus palabras con exactitud.”

## Contrato de Compromiso para los Facilitadores

*Como facilitador activo de cada sesión ME COMPROMETO A:*

1. **SER PUNTUAL EN CADA SESIÓN:** Esto demuestra mi compromiso para trabajar con su familia para superar desafíos, incluyendo los asociados a la LM/TCE.
2. **PERMITIR QUE CADA MIEMBRO DE LA FAMILIA TENGA LA MISMA CANTIDAD DE TIEMPO PARA HABLAR:** Dado que toda la familia enfrenta la situación de la LM/TCE, creo que es importante que cada uno de ustedes pueda exponer su opinión.
3. **MANTENER UNA POSICIÓN IMPARCIAL:** En vez de dar consejos en términos de lo que está “bien” o lo que está “mal”, demostraré aceptación y curiosidad. Aunque tenga experiencia en las áreas de funcionamiento individual y familiar, creo que usted es el experto de su propia experiencia.
4. **APORTAR COMENTARIOS CONSTRUCTIVOS:** Reflexionaré sobre lo que usted dice y hace para asegurarme que lo entiendo y, de esta manera, permitirle darse cuenta de sus propios procesos intra e interpersonales.
5. **PROPORCIONAR IDEAS PRÁCTICAS:** Le ofreceré varias estrategias para superar desafíos en el presente y el futuro.
6. **FOCALIZAR EN LAS FORTALEZAS:** En lugar de destacar los puntos débiles y enfatizar los problemas, resaltaré sus potencialidades y lo ayudaré a construir desde allí.
7. **MODERAR LAS SESIONES:** Cuando lo considere apropiado, amablemente interrumpiré las sesiones, haré comentarios y sugeriré maneras más eficaces de interactuar.
8. **TOMAR NOTAS:** En alguna ocasión tomaré nota de algo que usted dijo. Esto es para asegurarme de captar fielmente sus palabras.

*He leído las reglas del compromiso y acepto cumplirlas para contribuir al progreso de su familia.*

---

Firma del facilitador

Fecha

## Contrato de Compromiso de los Participantes

*Como participante activo de cada sesión ME COMPROMETO A:*

1. **PUNTUALIDAD:** Ser puntual a cada sesión demuestra su compromiso para mejorar la situación familiar. Si va a llegar tarde a una sesión, avise inmediatamente al facilitador.
2. **ASISTENCIA:** Asista a todas las sesiones semanales. Si va a estar ausente, avise inmediatamente al facilitador.
3. **PERMITIR QUE CADA MIEMBRO HABLE LA MISMA CANTIDAD DE TIEMPO:** Aunque la experiencia en común sea la LM/TCE, cada miembro de la familia tiene su propia opinión. Es muy importante que cada uno tenga oportunidad de hablar.
4. **HABLAR POR MI MISMO:** Es primordial que evite leer la mente. En su lugar, dé una breve exposición comenzando con la palabra “Yo” y enfóquese en sus emociones y experiencia.
5. **SER RESPETUOSO:** Las sesiones son más fructíferas cuando los participantes son respetuosos. Esto se lleva a cabo hablando con los otros participantes presentes en vez de hablar de ellos. Además, es importante que escuche atentamente a los otros participantes y evite interrumpirlos. Es imprescindible que hable una persona a la vez y que no existan conversaciones paralelas. Por último, no venga a las sesiones bajo el efecto de sustancias. Si este es el caso, se le pedirá que abandone la sesión.
6. **APOYAR A LOS MIEMBROS DE MI FAMILIA CON MIS PALABRAS Y ACCIONES:** Esto implica comunicar empatía, preocupación, respeto y confianza en las habilidades de todos los miembros de la familia. Por ejemplo, usted puede mostrar su apoyo escuchando atentamente y asintiendo con la cabeza, evitando las expresiones de aprobación o desaprobación, pero afirmando que comprende la situación. Por último, puede manifestar: “Me ayuda mucho saber lo que acabas de decir” y/o “Me gustaría saber más sobre lo que acabas de decir.”
7. **APORTAR COMENTARIOS CONSTRUCTIVOS:** Evite criticar a los miembros de su familia. Por el contrario, ayúdelos a ver el lado positivo de la situación de manera afectuosa y sensata. También evite presionar a los miembros de la familia diciéndoles lo que “deben” hacer.
8. **PROPORCIONAR IDEAS PRÁCTICAS:** Es más útil enfocarse en las soluciones en vez de lo negativo de la situación.
9. **FOCALIZARME EN EL PRESENTE:** En vez de focalizarse en el pasado, es importante focalizarse en el presente, que es donde se pueden hacer cambios.
10. **COMPLETAR LAS TAREAS ENTRE SESIONES:** Es importante que practique las habilidades/estrategias que aprende en las sesiones para que sean efectivas.
11. **EXPRESAR INQUIETUDES EN LAS SESIONES:** Es importante que aporte sus preguntas e inquietudes debido a que las sesiones están estructuradas para que usted se sienta seguro.

*He leído las reglas del compromiso y acepto cumplirlas para contribuir al progreso de mi familia.*

---

Firma del participante

Fecha

### 3. Consentimiento y cuestionario de base

Explique: *“Ahora que hemos aclarado el compromiso y el proceso de esta intervención, me gustaría señalar que también estamos interesados en saber si su aplicación produce beneficios en los individuos y en la familia.”*

*Para evaluarlo, se les pide a todos los miembros de la familia que completen unos cuestionarios una semana antes y una semana después que hayan terminado la intervención.*

*No obstante, es importante que antes de completar los cuestionarios entiendan el propósito, los procedimientos, los riesgos, los beneficios y las alternativas para participar en la investigación.*

*Tengan la libertad de hacer cualquier pregunta que crean necesaria. Después que yo haya explicado la investigación y ustedes hayan podido resolver todas sus dudas, se les pedirá que firmen el consentimiento informado.”* Entregue a cada participante una copia del Consentimiento. Léalo en voz alta. Permita que cada participante pueda leerlo a conciencia en su totalidad. Agregue: *“¿Tienen alguna duda que yo pueda aclarar?”* Responda todas las preguntas.

Continúe: *“Como he explicado anteriormente, antes de que comience la intervención, quisiera que completasen estos cuestionarios, así yo puedo estar al tanto de cómo ustedes y su familia están funcionando en este momento. Les pido que completen individualmente estos cuestionarios en su totalidad y me pregunten si tienen alguna duda.”* Entregue los cuestionarios a cada participante.

### 4. Tareas para realizar en el hogar para la Sesión uno

Recuerde a los asistentes: *“Hoy les he explicado que finalizaríamos cada sesión con una tarea para realizar en el hogar. Entonces, entre hoy y la próxima vez que nos reunamos, me gustaría que traigan un objeto que a su modo de ver mejor represente su experiencia con la LM/TCE. La próxima semana, les pediré que tomen uno o dos minutos para contarme sobre ese objeto y me describan las razones por las cuales lo consideran representativo de su experiencia.”*

## Segunda Sesión

### LM/TCE como una Experiencia Única y Compartida

#### Materiales

- ✓ Hoja de trabajos.
- ✓ Formulario de tareas para realizar en el hogar.
- ✓ Bolígrafos.
- ✓ Cuaderno de notas para tomar notas sobre las respuestas de los participantes.

#### Resumen

El objetivo de esta sesión es animar a los participantes a compartir sus ideas y experiencias de la LM/TCE para mejorar el entendimiento de unos y otros y construir un consenso familiar. A través de este proceso, los facilitadores validarán las experiencias de los miembros de la familia así como un modelo apropiado de comunicación utilizando escucha reflexiva. Las creencias erróneas acerca de la LM/TCE también serán abordadas mediante ejercicios de psicoeducación.

#### Índice de contenido del programa de trabajo

| Contenido                                                | Duración Sugerida<br>(Total 90 minutos) |
|----------------------------------------------------------|-----------------------------------------|
| 1. Revisión de expectativa y frase                       | 5 minutos                               |
| 2. Revisión de tareas realizadas en el hogar             | 10 minutos                              |
| 3. Discusión de creencias y experiencias sobre la LM/TCE | 35 minutos                              |
| 4. LM/TCE psicoeducación y significado                   | 35 minutos                              |
| 5. Asignación de tareas para realizar en el hogar        | 5 minutos                               |

#### 1. Revisión de expectativas y frase (5 minutos)

Empiece la sesión expresando: “Gracias por venir hoy. Me gustaría empezar recordándoles las expectativas y proceso de estas sesiones. Es importante que este sea un lugar seguro donde todos se sientan cómodos expresando sus sentimientos y pensamientos. Aunque es normal no estar de acuerdo entre nosotros, nuestro objetivo aquí es trabajar para incrementar el entendimiento entre los miembros de la familia.

*Creo que la experiencia y voz de cualquiera de nosotros es igualmente válida. Por esa razón, se han creado directrices que ya se explicaron en la sesión introductoria. Si observo que en algún momento no se están cumpliendo las expectativas o que se pueden realizar mejoras, simplemente extenderé mi mano y les pediré que guarden silencio. Después les proporcionaré retroalimentación y sugeriré formas más útiles de interactuar. Puede que también tome notas de vez en cuando para asegurarme de que estoy captando sus palabras con exactitud.”*

Diga “Tal como discutimos en la primera sesión, empezaremos cada sesión reflexionando sobre una frase relevante.” Entregue a cada participante una copia de la frase y diga: “Por favor lean la siguiente frase.” Permitales el tiempo suficiente para realizar la tarea.

*Lo importante no es lo que nos hace el destino, si no lo que nosotros hacemos con él.*

—Florence Nightingale

Diga “Ahora me gustaría que reflexionaran acerca de lo que significa esta frase para ustedes y cómo puede ser relevante para su situación.” En este punto, cualquiera que quiera hablar puede hacerlo. El facilitador debe comprobar si a aquellos que no contestan les gustaría añadir algo. Después de que los participantes terminen de reflexionar sobre la frase, por favor, afirme lo siguiente: “Por extraño que parezca, las experiencias y eventos en nuestras vidas no son inherentemente negativos o positivos. Somos nosotros quienes les damos significado. Así que no importa cuál sea el evento, somos nosotros quienes tenemos el poder de elegir cómo afectará a nuestras vidas. Así pues, es posible que dos personas que viven en el mismo hogar puedan tener un significado diferente (una interpretación diferente) de la misma experiencia, incluida la LM/TCE. Alguien lo verá como una amenaza a su modo de vida, mientras que otros pudieran verlo como un obstáculo que superar. Los resultados de investigaciones demuestran que las percepciones son importantes para los ajustes individuales y familiares de la LM/TCE. Por ello, me gustaría pasar algún tiempo hablando de cómo le dan significado a esta experiencia.”

#### 2. Revisión de tareas para realizar en el hogar (10 minutos)

Introduzca esta revisión diciendo: “La última vez que nos reunimos, les pedí que trajeran un

*objeto que mejor represente su experiencia con la LM/TCE. Me gustaría que cada uno de ustedes se tome 2 minutos para decirme qué objeto ha traído y describa cómo ese objeto es representativo de su experiencia.”* Durante este tiempo, el facilitador deberá usar la *escucha reflexiva* (ej. “Así que lo que escucho que usted dice es:”) y *validación* (ej. “Eso debe ser difícil”), así como tomar nota con exactitud de las palabras de los participantes.

### **3. Discusión de creencias y experiencias relacionadas con LM/TCE (35 minutos)**

Para poder animar a los participantes a hablar sobre sus creencias relacionadas con LM/TCE, explique: “*Sé que existen muchas ideas ahí fuera sobre la LM/TCE. Algunas las conocían antes de la LM/TCE, otras después. Me pregunto si están dispuestos a compartirlas conmigo en este momento. Estoy especialmente interesado en lo que ustedes creen que otras personas piensan sobre las familias que se enfrentan a la LM/TCE.*” Pida a los participantes que escriban sus creencias en la hoja de trabajo titulada “Creencias Relacionadas con la LM/TCE” y después abra el debate con las personas presentes. Sin emitir juicio, escriba las respuestas textualmente como las emplearon los participantes. Además continúe usando la *escucha reflexiva*. Prosiga con la siguiente pregunta: “*¿Cuáles de estas creencias piensan que son útiles para las familias que se enfrentan a una LM/TCE?, ¿Cuáles creen que podrían ser dañinas?*” Permita que los participantes indiquen al lado de cada significado si es de ayuda o no lo es. Durante este tiempo use la *validación* (ej. “No puedo imaginar cómo sería” o “Eso suena realmente difícil”) cuando los participantes discutan sus experiencias.

### **4. Psicoeducación de la LM/TCE y construcción de significado (35 minutos)**

Concluya la discusión sobre las creencias relacionadas con la LM/TCE y diríjalo hacia el componente psicoeducacional repartiendo a los participantes la hoja de trabajo titulada “Los 10 mitos acerca de la LM/TCE” y agregando: “*Como pueden ver, algunas de las ideas que han comentado son ideas equivocadas que se tienen sobre la LM/TCE (NORMALIZACIÓN). Voy a debatir brevemente*

*con cada uno de ustedes los resultados clínicos y de investigación que pueden mostrar una realidad distinta a los individuos y familias que viven con la LM/TCE*”. Conversando con los participantes, analice las conclusiones de la hoja de trabajo. Pida a los participantes que compartan lo que ellos piensan que se asemeja o no a su propia experiencia. Prosiga con la siguiente afirmación: “*Ahora me gustaría que expresen si han tenido experiencias similares a las mencionadas en “Los 10 mitos acerca de la LM/TCE”.* Apúntelas. Realice preguntas tales como “¿Cómo se las arregló para hacer eso?”, además, exprese sorpresa diciendo frases como “¡Qué bueno!”, cuando el individuo con LM/TCE o algún familiar hablen sobre la manera en las que superaron los obstáculos de la LM/TCE.

Cree un debate acerca del significado asociado a la lesión diciendo: “*Tengo una pregunta más que me gustaría que cada uno de ustedes contestasen: ¿Por qué creen que su familia está enfrentándose a la LM/TCE en este momento?*” (Tome nota de las respuestas de los participantes utilizando sus propias palabras).

**Nota:** Si un participante emplea un significado que parece crítico o despectivo, el facilitador debe interrumpir y hacer que él/ella lo reformule. Durante este proceso el facilitador deberá escribir las respuestas de los participantes utilizando exactamente las mismas palabras que utilizó el participante.

Explique, “*se den cuenta o no, siempre hay un significado para la familia*”. Después, el facilitador deberá animar a los participantes a buscar áreas en que estén de acuerdo. Si están teniendo problemas, el facilitador les prestará ayuda. Los ejemplos incluyen “Dios nunca nos da más de lo que podemos soportar” y “Es un castigo por los pecados cometidos”. El facilitador deberá determinar si la respuesta de algún participante se desvía significativamente del significado para la familia. Si es así, pregunte al individuo cómo es eso.

**Nota:** Puede que haya más de una persona cuya respuesta se desvíe del significado para la familia.

### **5. Explicar la tarea para realizar en el hogar (5 minutos)**

Concluya la sesión agradeciendo a los asistentes su participación y compromiso. Distribuya la hoja de tareas para realizar en el hogar e indique:

*“A partir de este momento y hasta la próxima vez que nos reunamos, me gustaría que observen, para que puedan describírmelo la próxima vez, qué está pasando en su (familia/matrimonio) que quieren que permanezca igual”.* Pida que hagan una lista de estas cosas en la hoja de trabajo titulada “Aspectos Positivos del Funcionamiento Familiar” para llevar a la siguiente sesión. Los participantes deberían

centrarse en observar aspectos positivos del funcionamiento familiar. Los ejemplos deberán incluir comportamientos individuales (ej. decir “Te quiero” a diario) o involucrarse en actividades familiares (ej. cenar juntos).

Al final de cada sesión por favor tome 2 minutos para preguntar a los participantes si ha cambiado el sentido de la frase.

*Lo importante no es lo que nos hace el destino, si no lo que nosotros hacemos con él.*

—Florence Nightingale

### Creencias Relacionadas con LM/TCE

¿Cuáles son algunas de sus creencias acerca de las personas con LM/TCE?

1. \_\_\_\_\_
2. \_\_\_\_\_
3. \_\_\_\_\_
4. \_\_\_\_\_

¿Cuáles son sus creencias sobre las familias que se enfrentan a la LM/TCE?

1. \_\_\_\_\_
2. \_\_\_\_\_
3. \_\_\_\_\_
4. \_\_\_\_\_

Observe la siguiente escala. Al lado de cada creencia, escriba el número que usted cree que mejor se corresponde con el beneficio que ésta pueda aportar a las personas y familias que se enfrentan a la LM/TCE.

|                    |   |   |   |   |                     |   |   |                 |   |    |
|--------------------|---|---|---|---|---------------------|---|---|-----------------|---|----|
| 0                  | 1 | 2 | 3 | 4 | 5                   | 6 | 7 | 8               | 9 | 10 |
| No ayuda para nada |   |   |   |   | Ayuda moderadamente |   |   | Ayuda muchísimo |   |    |

**Mitos acerca de la LM**

1. Todas las personas con lesión medular desarrollan depresión
2. Todas las lesiones medulares son iguales.
3. Las caídas son la causa de la mayoría de las lesiones medulares.
4. La lesión medular tiene cura y la persona podrá volver a caminar.
5. Se puede prevenir una LM/TCE inmovilizando la columna después del impacto.
6. La mayoría de lesiones medulares le ocurren a las personas mayores.
7. Las personas con lesión medular no pueden volver a trabajar
8. Las personas con lesiones medulares viven en hogares de cuidado para adultos mayores.
9. Las personas con lesión medular no son atractivas.
10. Las personas con lesión medular pueden transmitir su lesión a sus hijos.

## Los Mitos acerca de la LM

### 1. Todas las personas con lesión medular desarrollan depresión

Una creencia común es que después de la lesión medular las personas se deprimen. Algunos lo denominan el mito de la desesperanza. El pensamiento es similar a este, “*Si no puedo caminar nunca podré ser feliz nuevamente*”. Parte de este mito tiene que ver con la definición de la palabra *depresión*. No se está hablando de los intensos sentimientos de shock, pérdida y tristeza que a menudo sobrevienen en oleadas durante los primeros días y semanas tras la LM/TCE. Aquellos sentimientos son comunes y normales. La depresión se refiere al estado de ánimo de tristeza persistente o la pérdida de interés en la vida, así como los cambios al dormir y de apetito, poca energía, dificultad para concentrarse o tomar decisiones, inutilidad o culpabilidad, desasocio, inactividad o pensamientos recurrentes de muerte o suicidio. Cuando estos síntomas duran más que un par de semanas, se les puede llamar “depresión mayor”.

Sólo alrededor del 22% de las personas con LM/TCE padecen depresión mayor. Un estudio halló que durante la rehabilitación hospitalaria, 20% de los individuos con LM/TCE estaban deprimidos persistentemente, 18% estuvieron deprimidos por una semana y luego se recuperaron, y el 62% nunca estuvieron deprimidos en absoluto. Mientras la depresión mayor es más común después de la lesión medular en comparación con la población en general (la cual presenta una tasa del 4 al 7% de depresión), la mayoría de los sujetos con LM/TCE no se vuelven depresivos. Aunque para aquellos que lo hacen, éste es un problema muy real y serio.

### 2. Todas las lesiones medulares son iguales.

Las lesiones medulares no son todas iguales. Las lesiones medulares son completas o incompletas. En una lesión medular completa, no existe funcionamiento motor o sensitivo en absoluto bajo la lesión. Una lesión medular incompleta es aquella en la que el paciente puede tener movimiento parcial o sensaciones.

### 3. Las caídas son la causa de la mayoría de las lesiones medulares.

La mayoría de las lesiones medulares son ocasionadas por (en orden) accidentes de tráfico, violencia, así como heridas de bala, caídas y accidentes deportivos y recreacionales. Hay aproximadamente de 10 a 12.000 casos nuevos de LM/TCE por año, la mayoría ocurren en los hombres en edades entre los 16 y 30 años. Después de los hombres jóvenes, las personas mayores son más propensas a sufrir LM/TCE, posiblemente debido a las caídas o al aumento de la expectativa de vida tras un accidente.

### 4. La lesión medular tiene cura y la persona podrá volver a caminar.

Desafortunadamente, no hay cura para las lesiones medulares. Solamente el tratamiento intensivo, la terapia ocupacional y física y la atención a largo plazo puede ayudar a mantener la salud física de los pacientes pero no ayuda a que éstos puedan volver a caminar.

### 5. Se puede prevenir una LM/TCE inmovilizando la columna después del impacto.

No hay ninguna prueba de que una lesión medular se pueda evitar mediante la inmovilización de la columna vertebral al momento del accidente.

### 6. La mayoría de lesiones medulares le ocurren a las personas mayores.

La mayoría de las lesiones medulares le ocurren a los hombres en el rango de edad de 16 a 30 años.

## **7. Las personas con lesión medular no pueden volver a trabajar**

Afortunadamente, entre un 40 y un 60% de las personas con LM/TCE que trabajaban antes del accidente regresan a su lugar de trabajo durante el primer año de su lesión y estos datos en países desarrollados se incrementan a través del tiempo.

## **8. Las personas con lesiones medulares viven en hogares de cuidado para adultos mayores.**

Aproximadamente el 88% de las personas con LM/TCE regresan a una residencia privada o a su propia casa. La adaptación es necesaria, tanto en el entorno físico como en los métodos de afrontamiento utilizados por los pacientes con lesión medular. Alrededor del 7% de los pacientes con lesión medular acaban en hogares de cuidado para adultos mayores y el resto va a una residencia/hogar o a otro alojamiento.

## **9. Las personas con lesión medular no son atractivas.**

Este mito afecta la calidad de vida erótica y afectiva cuando se cree, ya que él o ella no se atreven a iniciar o reiniciar una vida en pareja. Muchos sienten que su cuerpo no cubre las expectativas de las posibles parejas sexuales; piensan que nadie se fijará en ellos/as ya que el modelo de belleza impuesto por la sociedad involucra a cuerpos musculosos y fuertes. Cada vez más esta idea se va erradicando debido al trabajo de resignificación que se hace, ya que el cuerpo de una persona con lesión medular contraviene con los valores de juventud, virilidad, feminidad, actividad y belleza física. Sin embargo, esto pesa más sobre la mujer con lesión medular que sobre el varón, ya que es más frecuente encontrar varones casados o en pareja que mujeres en la misma situación. El género femenino parece más dispuesto a no preocuparse por la silla de ruedas y aceptar como pareja a un varón con lesión medular que los hombres sin lesión aceptar como pareja a mujeres con lesiones medulares.

## **10. Las personas con lesión medular pueden transmitir su lesión a sus hijos.**

Las lesiones son producto de accidentes de trabajo o deportivos, o bien de heridas con armas punzocortantes o armas de fuego, esto es, se adquirió. Por ello, no pueden ser transmitidos genéticamente a la descendencia, así que este temor es infundado.

---

## **RECURSOS**

1. Bombardier C. Depression after spinal cord injury: Myths and facts. Spinal Cord Injury Update. Northwest Regional Spinal Cord Injury System. Department of Rehabilitation Medicine. University of Washington Medical Center and Harborview Medical Center. 2010;19(2). [http://sci.washington.edu/info/newsletters/articles/10\\_sum\\_depression.asp](http://sci.washington.edu/info/newsletters/articles/10_sum_depression.asp). Accessed August 25, 2013
2. Bonilla J. Protocolo de abordaje y tratamiento de la sexualidad en el lesionado medular. Central de Servicios Médicos del Banco de Seguros del Estado; 2009.
3. Cartwright R. Myths about Spinal Cord Injuries. The Cartwright Law Firm. 2010. <http://personal-injury-lawyers.com/blogs/archives/6083-Myths-about-Spinal-Cord-Injuries.html>. Accessed August 25, 2013.
4. The Law Offices of Michael Lawson Neff. Top 10 Spinal Cord Injury Myths. 2009. <http://www.mlnlaw.com/top-10-spinal-cord-injury-myths.html>. Accessed August 25, 2013.
5. The Minnesota Department of Employment and Economic Development. Spinal Cord Injury (SCI). Focus on ability. 2013. <http://www.focusonability.net/DisabilityBasics/Detail/165>. Accessed August 25, 2013.

## Los 10 Mitos acerca del TCE

1. Las personas que han sufrido un TCE estarán incapacitadas durante el resto de su vida y no serán capaces de volver a trabajar, funcionar de manera independiente y necesitarán supervisión constante para el resto de sus vidas.
2. Las personas que han sufrido un TCE están locas y no pueden controlar sus emociones. Estas personas no son responsables de sus actos y no deben rendir cuentas por sus acciones.
3. Las personas que han sufrido un TCE nunca serán las mismas que antes del accidente, incluso después de tener o completar un tratamiento de rehabilitación.
4. Las personas que han sufrido un TCE deben ser tratados como niños.
5. Cuando alguien sufre un TCE, es porque esa persona y / o su familia se lo merece.
6. Las personas que han sufrido un TCE no son capaces de mantener una relación íntima y nunca podrán casarse.
7. Cuando una persona que ha sufrido una lesión cerebral traumática decide tener un hijo, el hijo va a nacer con algún tipo de problema.
8. Los golpes en la cabeza son la única causa de un TCE.
9. La recuperación total tomará alrededor de un año.

## Los 10 Mitos acerca del TCE

### **1. Las personas que han sufrido un TCE estarán incapacitadas durante el resto de su vida y no serán capaces de volver a trabajar, funcionar de manera independiente y necesitarán supervisión constante para el resto de sus vidas.**

Esto puede ser cierto para algunas personas que han sufrido TCE severo, sin embargo, la mayoría de las personas que han sufrido una TCE pueden y tienen una vida productiva y satisfactoria. Según los resultados de estudios de investigación, el promedio de casos de regreso al empleo para aquellos pacientes con TCE severo es de 12,5% al 71%. Pero para las personas con TCE leve es hasta el 100% (Vuadens, Arnold, y Bellman, 2006). Existen muchos factores importantes que determinan si la persona es capaz de regresar al trabajo, incluyendo el apoyo familiar, la cultura, el tipo de trabajo y los niveles de educación y formación profesional.

Las personas que han sufrido un TCE severo pueden presentar dificultades para tener una vida independiente y, por lo tanto, necesitar apoyo. Sin embargo, la mayoría de las personas que han sufrido un TCE pueden y tienen una vida feliz, independiente y productiva. Los resultados de varios estudios de investigación han demostrado que las personas con TCE tienen la capacidad para integrarse a la comunidad y tener una vida independiente y productiva, con altos niveles de satisfacción y pocos apoyos ambientales (Harker, Dawson, Boschen, y Stuss, 2002)

### **2. Las personas que han sufrido un TCE están locas y no pueden controlar sus emociones. Estas personas no son responsables de sus actos y no deben rendir cuentas por sus acciones.**

Dependiendo de la localización y la severidad de las lesiones, algunas personas que han sufrido un TCE pueden presentar cambios de personalidad, cambios del estado del ánimo, disminución de la capacidad de controlarse a sí mismo o dificultades para aprender información nueva. Algunos de estos síntomas pueden mejorar con el paso del tiempo cuando se ofrece el tratamiento adecuado. Por otro lado, es necesario mencionar que las alteraciones psiquiátricas graves en estos pacientes son menos comunes. Los individuos con TCE tienen la necesidad de ser respetados, apoyados y comprendidos, y no ser rechazados o ignorados por temor o por la falta de conocimiento sobre la naturaleza de esta condición.

Los cambios de comportamiento con frecuencia se producen como resultado de una lesión cerebral traumática y muchos programas ofrecen tratamiento para personas con problemas de conducta leves. Sin embargo, cuando los problemas de conducta son severos, los programas especializados conocidos como programas residenciales resultan más efectivos en el manejo de las dificultades de conducta ya que están especialmente diseñados para tratar a este tipo de pacientes y cuentan con personal calificado para ayudar a los individuos al re-aprendizaje de un comportamiento adecuado a su contexto.

### **3. Las personas que han sufrido un TCE nunca serán las mismas que antes del accidente, incluso después de tener o completar un tratamiento de rehabilitación**

No se aconseja hablar en absolutos como el “nunca” y el “siempre”. Algunas personas que han sufrido un TCE severo pueden de hecho no recuperar el nivel de funcionalidad que tenía antes de la lesión. Sin embargo, la mayoría de personas con TCE presentan mejorías significativas y rápidas principalmente en los primeros seis a doce meses después de la lesión. Durante este tiempo, muchos regresan al trabajo y a la vida productiva con su familia o en la comunidad.

### **4. Las personas que han sufrido un TCE deben ser tratados como niños.**

Aunque pueda parecer que algunas personas se comportan de manera infantil después de un TCE, la mayoría de las personas con un TCE tiene la capacidad de tomar sus propias decisiones, realizar actividades de la vida diaria, manejar sus finanzas y asuntos personales, y funcionar independientemente. La experiencia

de haber sufrido un TCE no implica que el paciente sea un niño o deje de ser una persona adulta. Todos los pacientes TCE deben ser tratados con respeto y consideración.

#### **5. Cuando alguien sufre un TCE, es porque esa persona y / o su familia se lo merece.**

Cualquier persona puede tener un TCE y, literalmente, nadie es inmune a él. ¿Cómo podría alguien asegurar que no tendrá un accidente de coche, una desafortunada caída, una contusión cerebral durante la práctica de un deporte o un acto de violencia al azar? Todas estas circunstancias pueden llevar a un TCE. Las lesiones cerebrales pueden afectar a individuos de todas las razas, condiciones socioeconómicas y edades.

Las personas con TCE y sus familias necesitan apoyo y comprensión, no deben sentirse juzgados o castigados, esto no ayuda en el proceso de recuperación.

#### **6. Las personas que han sufrido un TCE no son capaces de mantener una relación íntima y nunca podrán casarse.**

Contrario a la creencia popular, las personas con TCE pueden hacer y mantener relaciones íntimas y casarse. Los resultados de estudios de investigación han demostrado que dos años después de sufrir una lesión en el cerebro, sólo el 15% de los matrimonios de los pacientes con TCE terminó en divorcio (Arango-Lasprilla et al., 2008). Por lo tanto, existe evidencia de que la tasa de divorcio después del TCE es aún más baja que la de la población general. Muchos factores son importantes para determinar el nivel de funcionalidad después de un TCE, pero la lesión cerebral en sí misma no es un obstáculo para lograr una vida íntima, saludable, feliz y productiva.

#### **7. Cuando una persona que ha sufrido una lesión cerebral traumática decide tener un hijo, el hijo va a nacer con algún tipo de problema.**

Un padre puede tener una discapacidad física o mental adquirida (como, por ejemplo, una lesión cerebral traumática o una amputación), pero él o ella no puede transmitírselo a los hijos, eso está en contra de todo lo que sabemos acerca de la genética y la herencia de los rasgos. Se ha demostrado una y otra vez que los individuos con TCE tienen hijos normales y sanos.

#### **8. Los golpes en la cabeza son la única causa de un TCE.**

La televisión y las películas nos han mostrado que las lesiones cerebrales se ocasionan únicamente por un fuerte golpe en la cabeza; ya sea en una caída o como resultado de recibir un golpe directo con un objeto. Sin embargo, éstas no son las únicas circunstancias que causan un TCE. Pensemos en el cráneo y el cerebro como un recipiente que contiene gelatina. La única diferencia con el recipiente normal es que la parte inferior del cráneo posee múltiples protuberancias que también pueden llegar a lesionarse. En un proceso rápido de aceleración, es posible que estas protuberancias se dañen y produzcan una lesión cerebral en el lóbulo temporal.

Cuando la cabeza se golpea o se somete a fuerzas de aceleración / desaceleración, el impacto ocasiona que el cerebro golpee el lado opuesto del cráneo. Entonces se provoca un daño en el área de impacto y en el lado opuesto del cerebro. A este golpe se le conoce como “efecto de latigazo” o “contragolpe”. Por ejemplo, puede provocarse una contusión cerebral cuando se sacude de forma muy fuerte a un niño (síndrome del niño sacudido).

#### **9. La recuperación total tomará alrededor de un año.**

Cuando una persona tiene una lesión cerebral, el concepto de recuperación puede ser engañoso. La recuperación normalmente significa que quien ha perdido una capacidad temporalmente, puede recuperar funciones con el paso del tiempo como sucede con un brazo roto. En una persona con TCE, aunque el proceso de recuperación puede parecer similar, los cambios pueden requerir más tiempo ya que los ajustes en el sistema nervioso central son un proceso continuo que requiere de trabajo, esfuerzo y apoyo.

---

**REFERENCIAS**

---

1. Arango-Lasprilla JC, Ketchum J, Dezfulian T, Kreutzer J, O'Neil-Pirozzi T, Hammond F, Jha A. Predictors of marital stability two years following traumatic brain injury. *Brain Inj.* 2008;22(7-8): 565-574.
2. Harker W, Dawson D, Boschen K, Stuss D. A comparison of independent living outcomes following traumatic brain injury and spinal cord injury. *Int J Rehabil Res.* 2002;25(2):93-102.
3. Stern BH. *10 Myths of Brain Injuries*. Web blog post. 2007. <http://www.braininjurylawblog.com/cat-10-myths-of-brain-injury.html>
4. The Center on Brain Injury Research & Training. *Myths & Facts About TBI*. <http://cbirt.org/tbi-education/about-tbi/myths-facts-about-tbi/>
5. Vuadens P, Arnold P, Bellmann A. Return to work after a traumatic brain injury: A difficult challenge. In: Gobelet C, Franchignoni F, eds. *Vocational Rehabilitation*. Paris: Springer; 2006:143-163.

**Aspectos Positivos del Funcionamiento Familiar**

Aunque entiendo que se trabajará para mejorar algunos aspectos de mi funcionamiento familiar, reconozco que mi familia está funcionando bien en algunas áreas.

En la parte de abajo, por favor, haga una lista de todas las cosas que su familia está haciendo bien. Especialmente cosas que quiere que continúen ocurriendo.

---

---

---

---

---

---

---

## Sesión Tres

### Cambiando de Foco

#### Materiales

- ✓ Hoja de trabajo.
- ✓ Cuaderno y bolígrafos para tomar notas de las respuestas de los participantes.

#### Resumen

El objetivo de esta sesión es ayudar a los participantes a cambiar el enfoque de los aspectos negativos por aspectos positivos de su situación. Se trabajará mediante psicoeducación brindando información sobre algunos cambios positivos que pueden ocurrir después de la LM/TCE. A través de terapia cognitivo-conductual, los participantes aprenderán a reconocer el impacto de sus pensamientos en sus sentimientos. Se proporcionará un enfoque estructurado para identificar y reformular pensamientos.

#### Índice del plan de trabajo

| Contenido                                                | Duración Sugerida<br>(Total 90 minutos) |
|----------------------------------------------------------|-----------------------------------------|
| 1. Presentación de la frase                              | 5 minutos                               |
| 2. Revisión de tareas realizadas en el hogar             | 15 minutos                              |
| 3. Prosperar a pesar de la LM/TCE                        | 20 minutos                              |
| 4. Psicoeducación sobre estrategias para cambiar el foco | 35 minutos                              |
| 5. Explicar la tarea para realizar en el hogar           | 15 minutos                              |

#### 1. Lectura de la frase (5 minutos)

Comentar: “*Tal y como hicimos la semana pasada, empezaremos esta sesión reflexionando sobre una frase importante.*” Suministre a cada participante una copia de la frase y solicite: “*Por favor, lean la siguiente frase.*” Permítale suficiente tiempo para hacerlo.

El cuerpo humano es el carruaje; el yo, el hombre que lo conduce; el pensamiento son las riendas y los sentimientos, los caballos.

—Platón

Continúe diciendo, “*Me gustaría que reflexionen acerca de qué significa esta frase para ustedes y cómo podría ser relevante para su situación.*” En este punto, cualquiera que quiera hablar puede hacerlo. Verifique si las personas que no han participado tendrían algo para añadir. “*Para poder tomar control de nuestra vida, es importante controlar nuestros pensamientos y emociones. Tal y como discutimos la semana pasada, las experiencias y eventos son inherentemente neutrales. No es hasta que les asignamos algún significado que se convierten en “buenas” o “malas”. Lo mismo es aplicable a pensamientos y emociones; están libres de valores. Es lo que hacemos con ellos lo que importa.*”

#### 2. Revisión de las tareas para realizar en el hogar (15 minutos)

Recordar a los presentes: “*La última vez que nos reunimos, les pedí que hicieran una lista de cosas que están ocurriendo en su familia que quieren que continúen igual. Me gustaría escuchar lo que han elaborado.*” En este punto, cualquiera que desee hablar puede hacerlo. Verifique si las personas que no hayan respondido tienen algo que agregar. Además, tome notas de las respuestas. Realice preguntas tales como “¿Cómo se las arregló para hacer eso?” y exprese sorpresa diciendo cosas como “¡Qué bueno!”, cuando las personas con LM/TCE o sus familias hablen sobre cómo lograron superar los obstáculos relacionados con la LM/TCE. Diga algo como “Es impresionante que continúe haciendo estas cosas incluso después de que la LM/TCE haya generado un impacto en su vida.”

Después, agregue: “*Se me ocurre que es mucho más fácil enfocarse en lo que no funciona en su familia después de padecer una lesión grave. Sin embargo, basándome en lo que me está diciendo, parece que hay muchas cosas que están funcionando bien.*”

**Nota:** Si un participante afirma que él/ella es incapaz de recordar algo positivo, pregunte al individuo que recuerde la última vez que las cosas estaban algo mejor (PREGUNTA DE EXCEPCIÓN). Si todavía no puede recordar nada, pida a los individuos que describan el mayor reto al que la familia se está enfrentando. Después, pida a la persona que evalúe la severidad en una escala de 1 (no problemático) a 10 (muy problemático) (PREGUNTA DE ESCALA). Después, pregúntale

a él/ella sobre un momento en el que el problema estuviese un punto por debajo en la escala (PREGUNTA DE EXCEPCIÓN).

Luego, pida a los participantes que reflexionen sobre la experiencia de completar la tarea para realizar en el hogar preguntando “¿Qué hizo diferente esta semana para poder enfocar su atención en lo que está funcionando bien en su familia? ¿Cómo planea mantenerlo?”

### **3. Cómo prosperar a pesar de padecer una lesión (20 minutos)**

Explique: “Es difícil no enfocarse en las pérdidas asociadas con la LM/TCE. Es fácil reconocer todas esas cosas que han cambiado en el individuo con LM/TCE y la familia; estos cambios son frecuentemente vistos como negativos. De todos modos, hay evidencias que indican que los eventos traumáticos pueden tener a veces consecuencias positivas en los individuos y sus familias. Además, algunos aspectos del funcionamiento familiar se mantienen igual pese a la LM/TCE, lo que es impresionante.”

Suministre la hoja de trabajo titulada “Cambios Positivos tras una LM/TCE” e indique: “Algunas veces tras pasar por eventos traumáticos, los individuos aumentan su confianza en sí mismos, lo cual no sólo afecta su autoevaluación sobre sus capacidades ante situaciones difíciles, sino también la probabilidad de enfrentarse a las dificultades de manera más asertiva. Los individuos que afrontan un evento traumático a veces llegan a la conclusión de que son más fuertes. Esta confianza podría generalizarse a otras situaciones, incluyendo futuros problemas.

Muchas personas cuando se enfrentan a una situación traumática observan un acercamiento en sus relaciones familiares, al darse cuenta de lo fácil que éstas pueden perderse. También experimentan un crecimiento emocional y un mayor aprecio hacia la persona con LM/TCE.

El reconocimiento de la propia vulnerabilidad puede llevar a una mayor expresividad emocional, a aceptar ayuda con más facilidad y en consecuencia, a la utilización de apoyos sociales que previamente habían sido ignorados.

*Además, los individuos y familias que se enfrentan a traumas también admiten cambios en sus prioridades, tales como tomarse la vida con más tranquilidad y disfrutarla más.*

*Conjuntamente, la dificultad para entender la LM/TCE puede llevar a algunos a fortalecer sus creencias religiosas y espirituales, lo cual puede llevar a un incremento en la sensación de control, intimidad y construcción de significado. Esta hoja de trabajo contiene algunos ejemplos de cambios positivos.”*

Expresa: “La siguiente pregunta que voy a realizar puede sonar algo extraña: ¿Qué ha cambiado para bien en su vida desde la lesión? Completa esta hoja de trabajo anotando los cambios que has advertido en ti mismo y en tus seres queridos.”

Una vez que todos los participantes lo hayan completado, dé tiempo para que los participantes compartan algunas de sus respuestas. Durante este tiempo, haga comentarios positivos y felicítelos. Por ejemplo, diga expresiones como: “Parece que realmente se han fortalecido apoyándose mutuamente” o, “Realmente admiro cómo fue capaz de hacer eso, se necesita mucha fuerza.”

### **4. Psicoeducación en estrategias para cambiar el foco (35 minutos)**

Diga: “Hasta ahora hemos estado hablando de distintas formas de ver la misma situación. Acabamos de estar hablando de las cosas que han mejorado en su familia después de la lesión. Tal y como implica la frase de hoy, nuestras experiencias no son lo que dan forma a nuestra vida. Es cómo pensamos y sentimos lo que da significado a nuestras experiencias. Nuestros pensamientos y sentimientos son muy importantes y me gustaría tomar un tiempo para hablar de cómo los pensamientos influyen en los sentimientos.”

Suministre la hoja de trabajo titulada “La importancia de los Pensamientos.” Repásenlo juntos poniendo atención en cómo los pensamientos, sentimientos y comportamientos están relacionados, tal y como se muestra en la figura que está en la parte superior de la hoja de trabajo. Después, explique la situación del ejemplo y ayude a los participantes a identificar otros pensamientos, sentimientos y comportamientos que pudieran surgir. Haga que los escriban en los

espacios provistos. Si en el curso de la discusión los siguientes pensamientos no surgen, por favor compártalos:

- ✓ “Tenía prisa. Debe estar muy ocupada.” → Sentimiento neutral
- ✓ “Ella piensa que es demasiado buena para cualquiera.” → Ira
- ✓ “Se sentía avergonzada de que la gente le viera hablando conmigo porque no visto tan bien como ella.” → Vergüenza
- ✓ “No me habrá visto, aunque yo pensaba que sí lo había hecho.” → Sentimiento neutral
- ✓ “Ella es una estúpida y trata a todo el mundo como si fuese basura. Yo merezco ser tratada mejor.” → Ira, rabia
- ✓ “Debe estar muy distraída pensando en el trabajo.” → Sentimiento neutral, Compasión
- ✓ “Soy tan poco importante que ni siquiera puede saludarme.” → Tristeza, Resentimiento

Ayude a cada miembro de la familia a identificar sus pensamientos diciendo: “*Algunas veces, las personas tienen dificultades identificando sus pensamientos. Hay tres maneras para hacerlo. Una forma es identificar cómo se siente y luego pensar por qué se siente de esa forma. Por ejemplo, podrías decirte a ti mismo <<Me siento triste porque no le gusto>>. Muchas veces, esta explicación es el pensamiento (ej., “No le gusto.”). La segunda forma es examinar su comportamiento. Después, puede trabajar retrospectivamente para identificar su comportamiento, lo que puede ayudarle a explicar sus pensamientos y sentimientos. Por ejemplo, puede que note que se distancia del resto. Cuando piensa sobre por qué hace esto, puede que se dé cuenta de que está teniendo pensamientos sobre usted, tales como <<No*

*soy lo suficientemente interesante>>.* Y por último, la tercera forma es identificar preguntas que pasan por su mente. Por ejemplo, puede que advierta que se está preguntando a sí mismo <<¿Qué está mal en mí?>> o <<¿Por qué no puedo hacer que le guste a la gente?>>. Habitualmente, cuando cambia estas preguntas en afirmaciones, identifica un pensamiento que tiene sobre sí mismo (ej., “Hay algo mal en mí” o “Nadie va a estar interesado en mí nunca”). Explique el resto de la hoja de trabajo “Qué Puedo Hacer Acerca de Mis Pensamientos.”

Entregue la hoja de trabajo titulado “Cambiando mis Pensamientos”, y exprese: “*Ahora me gustaría que prueben esto como una familia.*” Ayude a promover el debate familiar para que los miembros de la familia puedan ayudarse unos a otros a identificar pensamientos y emociones asociadas con ellos. Diga: “*Puede pensar sobre la charla de la semana pasada sobre conceptos equivocados relacionados con LM/TCE o sobre la charla de hoy para recordarse a sí mismo algunas de las cosas por las que ha pasado.*”

## 5. Explicar las tareas para realizar en el hogar (15 minutos)

Concluya la sesión agradeciendo a los asistentes su participación. Distribuya la hoja de trabajo a realizar en el hogar y afirme “*A partir de este momento y hasta la próxima vez que nos reunamos, me gustaría que practiquen este proceso de reformular pensamientos. Esto es, la siguiente vez que tengan un pensamiento angustiante, completen esta hoja de trabajo para ayudar a superarlo.*”

Al final de cada sesión por favor tome 2 minutos para preguntar a los participantes si ha cambiado el sentido de la frase.

*El cuerpo humano es el carruaje; el yo, el hombre que lo conduce; el pensamiento son las riendas, y los sentimientos, los caballos.*

—Platón

### Cambios positivos después de la LM/TCE

Las investigaciones sugieren que las personas que han sufrido experiencias muy traumáticas, incluyendo la LM/TCE, han logrado obtener algún significado positivo de la tragedia. Los sujetos y familias que padecen LM/TCE han podido percibir beneficios por lo menos en tres áreas:

| Autopercepción                | Relaciones                                  | Filosofía de Vida                       |
|-------------------------------|---------------------------------------------|-----------------------------------------|
| <i>“Me siento más fuerte”</i> | <i>“Valoro mi relación mucho más ahora”</i> | <i>“Ahora valoro mucho más la vida”</i> |

Debajo, escribe los cambios que ha percibido en usted o en sus seres queridos.

Cambios en autopercepción:

---



---

Cambios en relaciones:

---



---

Cambios en filosofía de vida:

---



---



---

### RECURSO

1. Tedeschi RG, Calhoun LG. The posttraumatic growth inventory: Measuring the positive legacy of trauma. *J Traumatic Stress*. 1996;9(3):455-471.

## La Importancia de los Pensamientos

Nuestros pensamientos, sentimientos y comportamientos están todos relacionados. Nuestros pensamientos influyen en cómo nos sentimos y cómo nos sentimos influye en cómo pensamos. Nuestros pensamientos y sentimientos influyen en cómo nos comportamos y nuestros comportamientos influyen en cómo pensamos y nos sentimos.

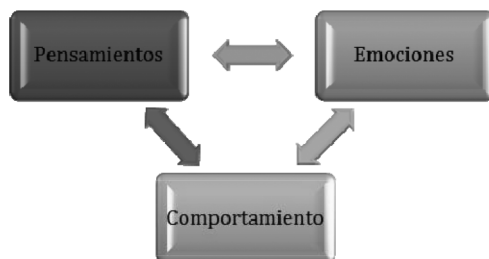

### ¿Por qué son mis pensamientos tan importantes?

Lo que piensa acerca de algo puede influir en cómo se siente. Vamos a utilizar la siguiente situación como ejemplo:

*Imagina que estás en una fiesta, conoce alguien nuevo y se pasa una hora hablando con esta persona. Realmente le gustó hablar con esa persona y piensa que a él/ella también le gustó. El siguiente día, está caminando por la calle y ve a esta persona, sonríe. Piensa que esta persona le ha visto pero ni sonríe ni le saluda.*

En la tabla de abajo, anota algunos de los pensamientos que tendría en esta situación, junto con sus sentimientos y comportamientos asociados. Hay un ejemplo.

|    | Pensamiento                                                             | Sentimiento         | Comportamiento           |
|----|-------------------------------------------------------------------------|---------------------|--------------------------|
| 1. | No soy lo suficientemente interesante para que esta persona me recuerde | Tristeza, Vergüenza | Distanciarme de la gente |
| 2. |                                                                         |                     |                          |
| 3. |                                                                         |                     |                          |

Los pensamientos por sí mismos no son buenos ni malos. Sin embargo, cuando tiene algunos pensamientos se siente bien y cuando tiene otros se siente mal. Además, su comportamiento puede cambiar dependiendo de cómo se sienta. Cuando toma conciencia de la relación entre pensamientos, sentimientos y comportamientos, se da cuenta del poder que tiene para ayudarse a sentirse mejor.

### ¿Qué Puedo Hacer con Mis Pensamientos?

Primero debe aprender a identificar sus pensamientos y a darse cuenta de cómo influyen en sus sentimientos y comportamientos.

Cuando se da cuenta de que un pensamiento está asociado a un sentimiento negativo, hay tres preguntas que puede hacerse para poder reformular el pensamiento y modificar el sentimiento que va con él. Las preguntas son:

1. ¿Tiene fundamento este pensamiento?
2. ¿Hay otro modo de ver esto?
3. Incluso siendo verdad, ¿es tan malo como parece?

Volvamos al ejemplo de la persona que conoció y que no sonrió o no le saludó al día siguiente. Una vez que identifique el pensamiento, “No soy lo suficientemente interesante para que me recuerden”, puede preguntarse a sí mismo alguna de estas tres preguntas. Ejemplo:

➤ Pensamiento: “No soy lo suficientemente interesante para que me recuerden.”

1. ¿Cuál es el fundamento? *Cuando realmente pienso en ello, no tengo ninguna prueba de que no soy interesante. Sólo porque la persona no me devuelva el saludo, no significa que yo no sea interesante. Además, esta persona estuvo hablando conmigo durante bastante tiempo en la fiesta, si no me hubiese encontrado interesante se hubiese marchado antes.*
2. ¿Qué otra forma tienes de ver esto? *Puede que esta persona no me viera. O puede que estuviera realmente ocupado/a o distraído/a.*
3. Incluso siendo verdad, ¿es tan malo como parece? *Supongo que no. Incluso si esta persona no me encuentra interesante, he estado toda mi vida sin ser amigo suyo por lo que tampoco estoy perdiendo tanto. Todavía puedo ser feliz y tener una buena vida si esta persona no me encuentra interesante.*

Después de contestar a estas preguntas, no debería pensar tan rápido que es una persona aburrida. Puede que no se sienta tan mal.

---

## RECURSO

---

1. Simpson G. *Suicide Prevention After Traumatic Brain Injury: A Resource Manual*. New South Wales, Australia: Brain Injury Rehabilitation Unit, South Western Sydney Area Health Service; 2001.

### Practicando Reformulación de Pensamientos

Como familia, piensen en una situación o evento reciente en el que se sintieron alterados emocionalmente. Idealmente, tendría que ser una situación que involucre a todos y no una situación donde una persona sea la responsable de provocar un conflicto mayor en la familia. En una o dos frases, resume la situación.

Situación:

---



---



---

Después, escribe algunos pensamientos acerca de esta situación o evento. También escribe los sentimientos y comportamientos asociados a cada pensamiento.

| Pensamiento | Sentimiento | Comportamiento |
|-------------|-------------|----------------|
| 1.          |             |                |
| 2.          |             |                |
| 3.          |             |                |
| 4.          |             |                |

De la lista de arriba, identifica qué sentimiento era el más desagradable. Escribe el pensamiento asociado con él debajo.

Pensamiento:

---

Después, contesta a las siguientes preguntas:

1. ¿Cuál es el fundamento de este pensamiento?

---



---



---

2. ¿Qué otra forma tiene de verlo?

---



---



---

3. Incluso siendo verdad, ¿es tan malo como parece?

---

---

---

**Ahora que ha contestado estas preguntas:**

★ ¿Qué cree de su pensamiento inicial?

---

---

---

★ ¿Cómo se siente ahora?

---

---

---

★ ¿Cómo cree que su comportamiento puede cambiar como resultado de haber reformulado su pensamiento de este modo?

---

---

---

★ ¿Cuál de los pensamientos de arriba tiene el mejor resultado? (teniendo en cuenta sentimientos y comportamientos)

---

---

---

### Practicando Cambiar los Pensamientos

Para nuestra siguiente sesión, practiquen la reformulación de sus pensamientos en torno a una situación específica que les esté dando problemas. La próxima vez que se sientan alterados emocionalmente, completen esta hoja de trabajo de manera similar a como lo hemos hecho en la sesión.

Situación:

---



---



---

| Pensamiento | Sentimiento | Comportamiento |
|-------------|-------------|----------------|
| 1           |             |                |
| 2           |             |                |
| 3           |             |                |
| 4           |             |                |
| 5           |             |                |

Tome el pensamiento que esté asociado con el sentimiento más desagradable y escríbalo debajo. Después conteste a las siguientes preguntas:

Pensamiento:

---

1. ¿Cuál es el fundamento de este pensamiento?

---



---



---

2. ¿Qué otra forma tiene de verlo?

---



---



---

3. Incluso siendo verdad, ¿es tan malo como parece?

---

---

---

**Ahora que ha contestado a estas preguntas:**

✱ ¿Qué opina sobre su pensamiento inicial?

---

---

---

✱ ¿Cómo se siente ahora?

---

---

---

✱ ¿Cómo cree que ha cambiado su comportamiento como resultado de haber reformulado sus pensamientos de esta manera?

---

---

---

✱ ¿Cuáles de los pensamientos de arriba han tenido más éxito (teniendo en cuenta sentimientos y comportamientos)?

---

---

---

## Sesión Cuatro

### Control de Emociones

#### Materiales

- ✓ Hojas de trabajo.
- ✓ Formulario de tareas para realizar en el hogar.
- ✓ Bolígrafos.
- ✓ Cuaderno de notas y bolígrafo.

#### Resumen

El objetivo de esta sesión es identificar los “signos de alerta” que indican una escalada emocional y practicar técnicas para controlar las emociones.

#### Índice del plan de trabajo

| Contenido                                      | Duración Sugerida<br>(Total 90 minutos) |
|------------------------------------------------|-----------------------------------------|
| 1. Presentación de la frase                    | 5 minutos                               |
| 2. Revisión de tareas realizadas en el hogar   | 10 minutos                              |
| 3. Separar las emociones de pensamiento        | 10 minutos                              |
| 4. Descifrar signos de alerta                  | 30 minutos                              |
| 5. Psicoeducación del control de emociones     | 30 minutos                              |
| 6. Explicar la tarea para realizar en el hogar | 5 minutos                               |

#### 1. Presentación de la Cita (5 minutos)

Diga: “*Tal y como hicimos la semana pasada, empezaremos esta sesión reflexionando sobre una frase relevante.*” Provea a cada participante con una copia y continúe diciendo: “*Por favor lean la siguiente frase*” (otorgue tiempo suficiente).

Cuando se exagera un sentimiento, desaparece la facultad de razonar.

—Gustave Le Bon

Agregue: “*Ahora me gustaría que reflexionen sobre el significado que esta frase tiene para ustedes y en cómo podría ser relevante para su situación.*” En este punto, cualquiera que quiera hablar puede hacerlo, pero verifique aquellos que no participan. Si los participantes no aportan ningún comentario, por favor, trabaje en ello: “*Cuando dejamos que las emociones tomen el control, es imposible usar la razón y comunicarse de manera efectiva. Aprendiendo*

*cómo controlar las emociones, los individuos pueden mejorar sus relaciones con el resto de la gente.*”

#### 2. Revisión de tareas para realizar en el hogar (10 minutos)

Diga: “*La última vez que nos reunimos, les pedí que practicaran la reformulación de sus pensamientos cuando se enfrentan a una situación angustiante. Me gustaría saber cómo les fue.*” En este punto, cualquiera que quiera hablar puede hacerlo. Verifique si las personas que no han participado tendrían algo para añadir. Tome notas de sus contestaciones. Además, haga preguntas como “*¿Cómo se las arregló para hacer eso?*”. Asimismo, exprese sorpresa diciendo cosas como “*¡Qué bien!*”, cuando los individuos con LM/TCE y/o los miembros de la familia discuten las formas en las que reformularon sus pensamientos. Después, pregunte “*¿De qué se ha dado cuenta en la relación que hay entre pensamientos y emociones?*”. Utilice la escucha activa y la validación.

Recuerde: “*En la última sesión discutimos cómo las emociones, pensamientos, y comportamientos influyen unos sobre otros simultáneamente. Centramos gran parte de la sesión en reformular nuestros pensamientos. En esta sesión, vamos a centrarnos más en el control de nuestras emociones puesto que estar desbordado por las emociones puede ser contraproducente.*”

#### 3. Separando las emociones del pensamiento (Auto-diferenciación) (10 minutos)

Explique: “*Cuando los individuos se dejan llevar por las emociones, se generan cambios en sus cuerpos que no les dejan pensar con claridad. Como resultado, puede que hagan o digan cosas de las que se arrepientan.*”

Entregue a cada participante la hoja de trabajo titulada “Cambios Fisiológicos Debido a la Escalada Emocional” y revísenla juntos. Continúe diciendo: “*Esta hoja de trabajo explica lo que ocurre cuando la gente percibe peligro físico o emocional y se activa la respuesta de lucha o huida. Por ejemplo, puede ver que su ritmo cardíaco incrementa para llevar el oxígeno más rápido. Estos individuos podrían describir que es como si el corazón se le fuese a salir.*”

Diga: “*Puede ver que hay distintas maneras en las que el cuerpo reacciona al estrés o al peligro*

*percibido. La respuesta lucha-huida puede ser activada por distintos niveles de estrés o peligro percibido. Frecuentemente, es activada cuando las personas se enfadan tras una discusión. Cuando se activa la respuesta lucha-huida y el cuerpo está sufriendo estos cambios, es difícil utilizar un juicio adecuado. Por eso, cuando las personas están en medio de una discusión y sus cuerpos están pasando por todas estas sensaciones diferentes, puede ser difícil tener una discusión que aporte alguna ayuda. Por este motivo, es importante aprender los signos de alerta cuando empieza la escalada emocional, así como maneras de intervenir para prevenirla.*

#### **4. Descifrando signos de alerta (30 minutos)**

*Explique, “Tal y como hablamos la semana pasada, los pensamientos, emociones y eventos están libres de valor. Es lo que hacemos con ellos lo que realmente importa. Para controlar sus emociones de manera efectiva, es beneficioso que primero se identifiquen los signos que sugieren que estamos empezando a tener una escalada de emociones. Estos son los primeros indicadores para usted o las personas que están a su alrededor que avisan que está empezando a perder el control sobre sus emociones.”*

*Distribuya la hoja de trabajo titulado “Mis Signos de Alerta” y agregue: “Me gustaría que cada uno de ustedes piense en la última vez que se dejaron llevar por sus emociones”.*

*Lea las consignas en voz alta para los participantes y explique que todos ellos deben dibujar sus signos de alerta. Explique con más detenimiento distribuyendo la hoja de trabajo titulada “Mis Signos de Alerta” diciendo: “Aquí hay un ejemplo. La primera cosa que una persona se da cuenta cuando sus emociones están empezando a desbordar es que las palmas de su mano comienzan a sudar. Por lo tanto, él/ella colocó palmas sudorosas en el primer paso. Después de que las palmas suden, su estómago se tensa. Por eso, en el siguiente paso eso fue lo que colocó.”*

*Continúe diciendo: “Ahora, mientras piensa en la última vez que tuvo una escalada emocional, intente acordarse del primer signo que notó e ilústrela en la hoja de trabajo que está en blanco. Continúe hasta que haya colocado los signos más importantes que percibe en usted cuando sus emociones incrementan.”*

*Haga que los participantes compartan sus respuestas en voz alta. Después de que cada participante comparta sus signos de alerta, invite a otros miembros de la familia a que le den retroalimentación. Pregunte: “¿Qué piensan de lo que (diga el nombre de la persona) acaba de describir? Debería comentarle a (nombre del individuo) si se nota otros signos de alerta. De todos modos, por favor acuérdesse de hablar de comportamientos específicos, no emita ningún juicio”.*

*Después de que cada participante haya descrito sus signos de alerta y haya recibido la retroalimentación por parte de otros miembros de la familia, pregunte: “¿Qué ha aprendido sobre lo que le pasa cuando sus emociones empiezan a escalar? Escriba sus pensamientos en el espacio que hay al final del documento.”*

*Permita que los miembros de la familia compartan sus pensamientos si así lo desean.*

#### **5. Psicoeducación sobre el control de las emociones (30 minutos)**

*Señale: “Cada uno de ustedes ha identificado sus signos de alerta y ha aprendido sobre los signos de alerta del otro. Es importante para ustedes y los miembros de sus familias que los reconozcan enseguida antes de que se salgan de control. Ahora que los han identificado, el siguiente paso es aprender maneras de intervenir rápidas para prevenir la escalada y controlar las emociones de manera más eficaz. Vamos a pasar algún tiempo hablando sobre las distintas estrategias que pueden utilizar para controlar sus emociones.”*

*Diga: “Si ve un signo de alerta en un miembro de su familia, descríbalos sin asignarle una emoción. Por ejemplo, podría decir <<Me he dado cuenta de que estás aumentando tu voz, que es uno de tus signos de alerta. Estoy pensando cómo podría ayudarte para que te calmares>>. Eso es diferente a preguntar <<¿Por qué estás tan enojado?, ¿Tienes que calmarte!>>” Haga que los participantes señalen los signos de alerta a los miembros de su familia de manera constructiva. Intervenga cuando sea necesario para reducir opiniones sentenciosas.*

*“Una estrategia para controlar emociones después de que usted o algún miembro de su familia note un signo de alerta es tomarse un tiempo fuera*

(TIME-OUT). *Esto implica ver una señal que indica que usted o algún miembro de su familia están teniendo una escalada emocional basada en los signos de alerta que usted ha descrito. Esta señal puede ser una palabra o un sonido que tenga especial significado para usted o alguno nuevo que quiera inventar. Por favor, toma un tiempo para decidir sobre una señal ahora.*

Cuando se pongan de acuerdo sobre una señal prosiga: *“Es importante que sigan las indicaciones para un tiempo fuera efectivo”*. Entrégueles la hoja de trabajo titulada “Pautas para un Tiempo Fuera Efectivo” y revísenla juntos. Explique: *“Ahora vamos a debatir algunas estrategias que pueden usar durante el tiempo fuera o durante cualquier otro momento para ayudar a tranquilizarse.”*

Distribuya la hoja de trabajo que se titula “Ejercicios para Ayudar a Controlar Tus Emociones”. Explique: *“Hay dos ejercicios diferentes que puede hacer para ayudar a controlar sus emociones. No estoy diciendo que cuando esté triste o en medio de una pelea debería simplemente relajarse, pero estos ejercicios le ayudarán a estar más sintonizado con los signos físicos que genera la escalada emocional. A medida que vaya siendo más consciente de su cuerpo, irá siendo más capaz de detectar que sus emociones están escalando. Es más, podrá ser más capaz de relajar su cuerpo para sentirse más calmado. Vamos a tomar entre diez y quince minutos para practicar estos ejercicios ahora.”*

Distribuya el registro de relajación e indique: *“Antes de que empecemos, me gustaría que cada uno de ustedes me dé una evaluación de cómo de relajados se sienten en este momento en una escala del 0 al 10, donde 0 significa que no están relajados y 10 significa que se sienten más relajados que nunca. Escriban sus evaluaciones en el espacio del registro apropiado para ello.”*

*Bueno, vamos a empezar con la respiración. Durante estos ejercicios, les pediré que cierren los ojos para centrarse en ustedes mismos sin ninguna otra distracción.* Guíe a los participantes a través del ejercicio utilizando la guía de respiración que hay en la hoja de trabajo. Al terminar el ejercicio de respiración, haga que los participantes evalúen su nivel de relajación y que lo escriban en el registro. Analice las diferencias que cada uno de los participantes haya relatado. Además, distribuya

la “Ficha de Respiración” explicando que pueden recortar la ficha y guardarla para que sea más sencillo practicar el ejercicio de respiración. Después, practiquen la relajación muscular poniendo el CD de relajación. Al terminar el ejercicio de relajación muscular, haga que los participantes evalúen su nivel de relajación.

**Nota:** A veces, los participantes sienten más tensión después de realizar el ejercicio en la sesión. Si esto ocurre, ayude al participante a indagar qué ha podido pasar. Pregúntele qué tipo de pensamientos y sentimientos tuvo durante el ejercicio y considere la posibilidad de que el participante haya pensado que el ejercicio era estúpido. Después, sugiérale que intente practicar el ejercicio en casa para ver si hay alguna diferencia.

Resuma las estrategias diciendo: *“Han aprendido algunas estrategias para controlar sus emociones. Las practicaron en la sesión y tienen varias herramientas que pueden utilizar. Tienen instrucciones para llevar a cabo un tiempo fuera efectivo, una ficha de respiración que pueden recortar para usarla como recordatorio de cómo respirar para relajarse y un CD para que puedan practicar la relajación muscular progresiva por su cuenta.”*

## 6. Discusión de las tareas para realizar en el hogar (5 minutos)

Concluya la sesión agradeciendo a los asistentes por su compromiso y participación. Distribuya la hoja de trabajo de tareas para realizar en el hogar y explique: *“La respiración y la relajación muscular progresiva han demostrado ser útiles para la gente que experimenta estrés. A partir desde este momento y hasta la próxima vez que nos reunamos, me gustaría que practiquen por lo menos una de estas técnicas todas las veces que lo consideren necesario. Pueden utilizar esta semana para practicar ambas estrategias y ver cuál funciona mejor para ustedes. De todos modos, si prefieren una, pueden centrarse en ella. Por favor, completen el registro de relajación antes y después de practicar para que puedan comprobar cómo su cuerpo reacciona a los ejercicios.”*

Al final de cada sesión por favor tome 2 minutos para preguntar a los participantes si ha cambiado el sentido de la frase.

*Cuando se exagera un sentimiento, desaparece la facultad de razonar.*

—Gustave Le Bon

## Cambios Fisiológicos frente a la Escalada Emocional

Cuando está estresado o percibe peligro físico o emocional, la respuesta de lucha-huida es activada por el sistema nervioso. Esta respuesta está diseñada para ayudar a preparar a su cuerpo para luchar o huir. Muchos cambios fisiológicos están asociados a esta respuesta:

| Efecto Físico                                                                              | Propósito                                                             | Sensaciones                                                                                     |
|--------------------------------------------------------------------------------------------|-----------------------------------------------------------------------|-------------------------------------------------------------------------------------------------|
| ✓ Incremento del ritmo cardíaco                                                            | Llevar el oxígeno más rápido                                          | Aceleración del corazón                                                                         |
| ✓ Redirección del flujo sanguíneo lejos de la piel, los dedos y hacia músculos más grandes | Incrementar la energía para los músculos grandes para luchar o huir   | Hormigueo en manos y piernas, piel pálida y fría                                                |
| ✓ Incremento de la respiración                                                             | Llevar el oxígeno a más músculos y el cerebro para proveer de energía | Respiración más rápida, mareos, dolor o sensación de opresión en el pecho, o sensación de ahogo |
| ✓ Incremento del sudor                                                                     | Enfriamiento del cuerpo para prevenir el sobrecalentamiento           | Sudor                                                                                           |
| ✓ Dilatación de pupilas                                                                    | Incremento del campo visual para prepararse para el peligro           | Visión borrosa, sensibilidad a la luz, ver manchas                                              |
| ✓ Supresión del sistema digestivo                                                          | Redireccionar la energía hacia la lucha o huida                       | Decrecimiento de la salivación, boca seca, diarrea, calambres estomacales                       |
| ✓ Incremento de la activación muscular                                                     | Preparar para la lucha o huida                                        | Tensión muscular, temblores, sensación de debilidad                                             |

Cuando está experimentando la respuesta de lucha-huida, es difícil prestar atención a lo que otra persona está diciendo. Es imposible mantener una discusión y la técnica de solución creativa de problemas raramente es una opción en estas situaciones.

## RECURSO

1. Barlow DH, Craske MG. *Mastery of Your Anxiety and Panic: Client Workbook for Anxiety and Panic*. 3rd ed. New York: Oxford University Press; 2000.

### Mis Signos de Alerta (Ejemplo)

Debajo hay un dibujo de una escalera mecánica emocional. Hay una persona subiendo la escalera que puede ver en distintos puntos de la escalera. En la parte inferior de la escalera la persona se siente calmada. Aun así, cuando va subiendo la escalera, la persona siente que cada vez se está dejando llevar más por sus emociones. Esta persona ha dibujado diferentes cosas que ocurren cuando se está en una situación de escalada emocional.

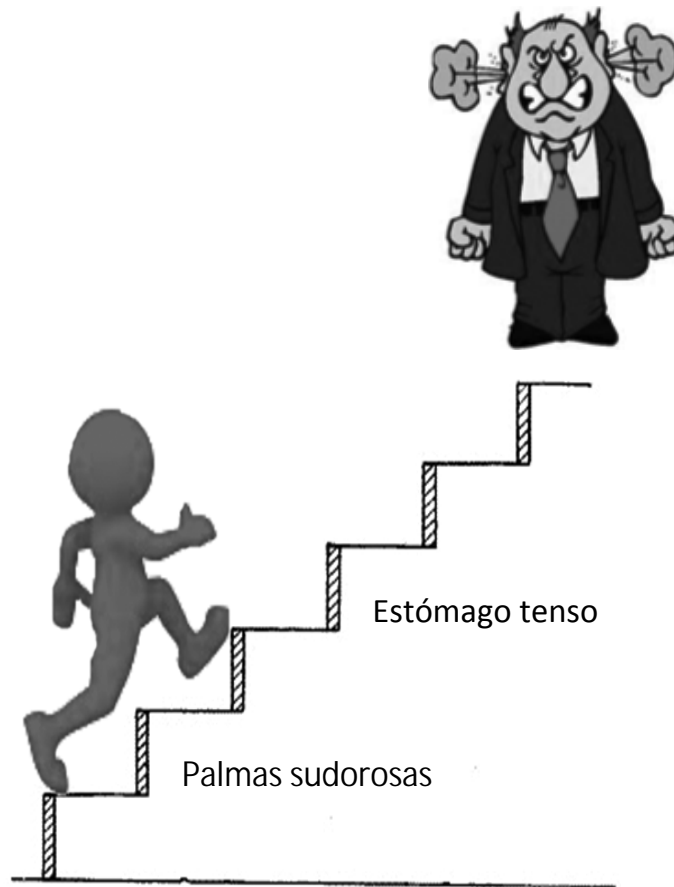

### Mis Signos de Alerta

Debajo hay un dibujo de una escalera emocional. Hay una persona subiendo la escalera que puede ver en diferentes pasos de la escalera. En la parte de abajo, la persona se siente calmada. Aun así, a medida que la persona sube por la escalera, se empieza a sentir que está perdiendo el control de sus emociones. Pensando sobre la última vez que se dejó llevar por sus emociones, ilustre las cosas que nota en usted que le producen una desestabilización emocional.

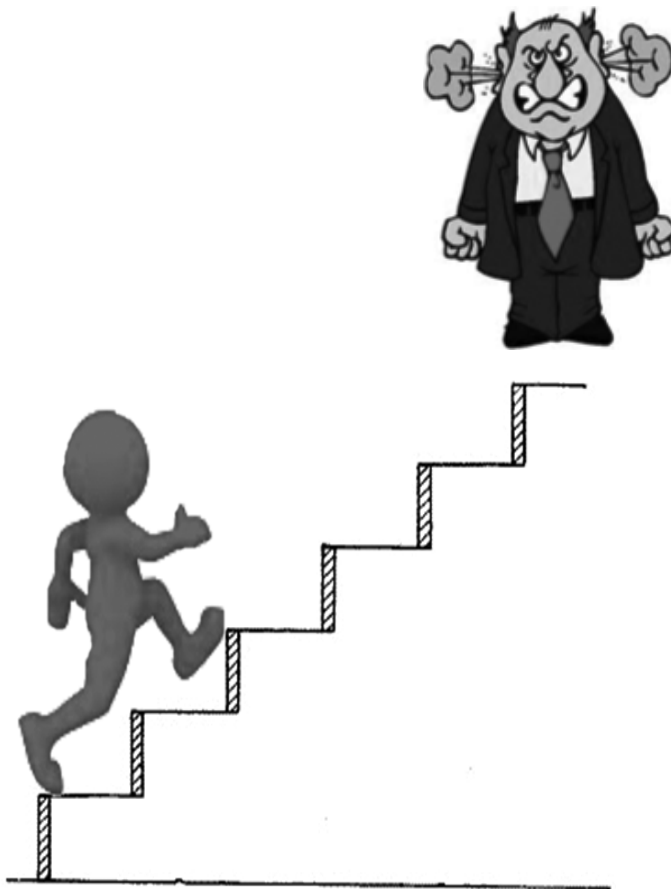

Después de completar el ejercicio y escuchar la retroalimentación de los miembros de mi familia, he aprendido lo siguiente acerca de cuáles son mis signos de alerta y mi habilidad para controlar mis emociones:

---

---

---

---

Estos son signos de alerta. Es importante para mí reconocerlos lo antes posible para así poder controlar mis emociones antes de que estén fuera de control.

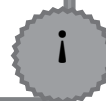

### **Pautas para un Tiempo Fuera Efectivo**

Un tiempo fuera es un pequeño descanso que le ayuda a calmarse y a recuperar la perspectiva. El objetivo es usar el tiempo fuera para cambiar el estado de su mente, crear un espacio, auto-calmarse y entender por qué se siente de esa manera; no se trata de evitar o controlar la situación. Un tiempo fuera le permite pensar en cómo expresarse de manera positiva, intentar pensar sobre los sentimientos de la otra persona y tomar perspectiva antes de hablar, y volver a la discusión con la otra persona para resolver el problema de manera calmada. Un tiempo fuera debería durar **al menos 30 minutos, pero no más de 24 horas**.

1. **COMUNICAR QUE NECESITA UN TIEMPO FUERA.** Cuando se sienta demasiado exaltado para hablar, indique claramente que necesita un descanso para calmarse y pensar. Asegúrele a la otra persona que no está tirando la toalla y que intenta que funcione.
2. **HAGA QUE EL TIEMPO FUERA SEA CORTO.** Llegue a un acuerdo antes de la siguiente discusión acerca de cuánto tendría que durar el tiempo fuera. Si utiliza un tiempo fuera y nota que necesita más tiempo, vuelva a la discusión, tal y como acordó, e indique que necesita más tiempo.
3. **TRANQUILIZARSE Y REFLEXIONAR.** Una vez que se tome un descanso en la discusión, utilice el tiempo para tranquilizarse. Céntrese en relajarse y respire profundo. Deje que cualquier tipo de ira o pensamientos negativos que pueda estar experimentando se vayan. Pregúntese a sí mismo lo siguiente: ¿Cuál es la emoción subyacente?, ¿En vez de ira, puede que se sienta herido/a?, ¿Qué necesita para sentirse mejor?, ¿Cómo pueden sus acciones haber contribuido a la situación?, ¿Qué hará de manera diferente cuando vuelva?
4. **VOLVER Y REPARAR.** Asegúrese de que vuelve a la discusión transcurrido el tiempo que acordó. Puede que se dé cuenta de que el motivo de pelea no era tan importante. Pida perdón por cualquier daño que haya podido causar en la discusión anterior. Además, mantenga una conversación tranquila y objetiva acerca de por qué ambos actuaron de esa manera, para así promover un entendimiento mutuo de cuáles son los sentimientos de cada uno e intentar evitar futuros daños.

## Ejercicios para ayudarte a controlar tus emociones

Hay dos ejercicios diferentes que puede hacer para ayudar a relajarse y a recuperar el control de sus emociones: respiración y relajación muscular progresiva. Ambos ejercicios le ayudan a darse cuenta de los signos de relajación física.

### Respiración

Respirar profundamente es muy útil para ayudar a relajar su cuerpo y su mente. La respiración profunda implica llenar el abdomen y los pulmones de aire lentamente y después vaciarlos lentamente.

#### Instrucciones:

Busque un lugar tranquilo para usted donde nadie le moleste. Siéntase en una silla cómoda y espere unos cuantos segundos para calmarse. Cierre los ojos. Respire profundo como si estuviera llenando el abdomen desde abajo hasta su pecho. Mientras inhala, su vientre debería empujar hacia fuera, lejos de su cuerpo. Mantenga la respiración tanto tiempo como pueda hacerlo de manera cómoda y después exhale lentamente. Continúe respirando lentamente de esta manera. Mientras respira, céntrese en su respiración y trate de visualizar el aire fresco entrando por su nariz, llenando sus pulmones y después abandonando su cuerpo. Intente mantener la respiración de manera tranquila y fluida. Piense en el aire entrando y saliendo de su nariz. Lo ideal, es que piense solamente en respirar. De todos modos, es normal que otros pensamientos aparezcan en su cabeza. Cuando esto ocurra, no se enfade o tire la toalla. Simplemente deje que los pensamientos pasen a través de su mente y devuelva la atención a su respiración.

### Relajación Muscular Progresiva

La relajación muscular progresiva implica relajar el cuerpo. Primero tense varios grupos musculares de su cuerpo y después suelte la tensión para que los músculos se relajen. Esto le ayuda a aprender qué se siente al estar tenso y qué se siente al estar relajado. A medida que va siendo más consciente de su cuerpo, será más capaz de detectar que sus emociones están escalando. Además, también será más capaz de relajar su cuerpo para sentirte más calmado.

#### Instrucciones:

Use el CD que ha sido suministrado en la sesión y practique el ejercicio tanto como sea posible.

---

## RECURSOS

---

1. Barlow DH, Craske MG. *Mastery of Your Anxiety and Panic: Client Workbook for Anxiety and Panic*. 3rd ed. New York: Oxford University Press, Inc; 2000.
2. Clark L. *SOS Help For Emotions*. 2nd ed. Bowling Green, KY: SOS Programs & Parents Press; 2002.

## Ficha de Respiración

Recorta la ficha de abajo para que puedas llevarla en tu monedero o cartera o dejarla en algún sitio donde te sientas cómodo/a para practicar la respiración. Úsala como recordatorio de que debes utilizar algún tiempo fuera durante el día para relajarte y calmarte.

### Ficha de Respiración

\*Busca un lugar tranquilo para ti donde nadie te moleste.

\*Siéntate en una silla cómoda y espera unos cuantos segundos para calmarte.

\*Cierra los ojos.

\*Respira hondo como si estuvieras llenando el abdomen desde abajo hasta tu pecho. Mientras inhalas, tu vientre debería empujar hacia fuera, lejos de tu cuerpo.

\*Mantén la respiración tanto tiempo como puedas hacerlo de manera cómoda y después exhala lentamente.

\*Continúa respirando lentamente de esta manera. Mientras respiras, céntrate en tu respiración y trata de visualizar el aire fresco entrando por tu nariz, llenando tus pulmones y después abandonando tu cuerpo. Intenta mantener la respiración de manera calmada y fluida.

\*Piensa en el aire entrando y saliendo por tu nariz.

\*Lo ideal es que pienses solamente en respirar. De todos modos, es normal que otros pensamientos aparezcan en tu cabeza. Cuando esto ocurra, no te enfades o tires la toalla. Simplemente deja que los pensamientos pasen a través de tu mente y devuelve la atención a tu respiración.

## Tareas para Realizar en el Hogar: Registro de Relajación

### Practique en la sesión:

| Fecha | Tiempo              | Ejercicio           | Evaluación |         |
|-------|---------------------|---------------------|------------|---------|
|       |                     |                     | Antes      | Después |
| _____ | <i>En la sesión</i> | Respiración         | _____      | _____   |
| _____ | En la sesión        | Relajación Muscular | _____      | _____   |

Para nuestra próxima sesión, practique respiración y/o relajación muscular tanto como sea posible. Utilice la tabla de abajo para evaluar el progreso.

| Fecha | Tiempo | Ejercicio                                    | Evaluación |         |
|-------|--------|----------------------------------------------|------------|---------|
|       |        |                                              | Antes      | Después |
| _____ | _____  | <input type="checkbox"/> Respiración         | _____      | _____   |
| _____ | _____  | <input type="checkbox"/> Relajación Muscular | _____      | _____   |
| _____ | _____  | <input type="checkbox"/> Respiración         | _____      | _____   |
| _____ | _____  | <input type="checkbox"/> Relajación Muscular | _____      | _____   |
| _____ | _____  | <input type="checkbox"/> Respiración         | _____      | _____   |
| _____ | _____  | <input type="checkbox"/> Relajación Muscular | _____      | _____   |
| _____ | _____  | <input type="checkbox"/> Respiración         | _____      | _____   |
| _____ | _____  | <input type="checkbox"/> Relajación Muscular | _____      | _____   |
| _____ | _____  | <input type="checkbox"/> Respiración         | _____      | _____   |
| _____ | _____  | <input type="checkbox"/> Relajación Muscular | _____      | _____   |

|             |   |   |   |                        |   |   |   |                   |   |    |
|-------------|---|---|---|------------------------|---|---|---|-------------------|---|----|
| 0           | 1 | 2 | 3 | 4                      | 5 | 6 | 7 | 8                 | 9 | 10 |
| No relajado |   |   |   | Moderadamente relajado |   |   |   | Óptima relajación |   |    |

## Sesión Cinco

### Comunicación Efectiva

#### Materiales

- ✓ Folletos.
- ✓ Hoja de trabajo con las tareas para realizar en el hogar.
- ✓ Bolígrafos para que los miembros de la familia puedan completar las hojas de trabajo.
- ✓ Libreta de notas y bolígrafo.

#### Resumen

El objetivo de esta sesión es aprender técnicas para comunicarse de manera efectiva

#### Índice del plan de trabajo

| Contenido                                                              | Duración Sugerida<br>(Total 90 minutos) |
|------------------------------------------------------------------------|-----------------------------------------|
| 1. Exposición de la frase                                              | 5 minutos                               |
| 2. Revisión de tareas realizadas en el hogar                           | 10 minutos                              |
| 3. Debatar de forma adecuada                                           | 15 minutos                              |
| 4. Signos de peligro en la comunicación                                | 15 minutos                              |
| 5. Estrategias para luchar contra los peligros de la mala comunicación | 40 minutos                              |
| 6. Explicar la tarea para realizar en el hogar                         | 5 minutos                               |

#### 1. Exposición de la frase (5 minutos)

Expresé: “Tal y como hicimos la semana pasada, empezaremos esta sesión reflexionando sobre una frase importante.” Suministre a cada participante una copia de la frase y solicite: “Por favor, lean la siguiente frase” (Permita un tiempo razonable para ello).

Una gran manera de saber manifestarse es la de, primero, saber escuchar y, segundo, saber hablar.

—Rene Descartes

Agregue: “Ahora me gustaría que reflexionen acerca de lo que esta frase significa para ustedes y cómo podría ser relevante para su situación.” En este punto, cualquiera que desee hablar puede hacerlo. Verifique si las personas que no han participado tendrían algo para añadir. Si los participantes no aportan ningún comentario, por favor, trabaje en

ello: “Ser capaz de comunicarse de manera efectiva es extremadamente importante. Escuchar y hablar son los cimientos de una comunicación efectiva.”

#### 2. Revisión de tareas para realizar en el hogar (10 minutos)

Diga: “La última vez que nos reunimos, les pedí que practicasen algunas de las técnicas de relajación que habíamos aprendido en la sesión anterior. Quisiera saber acerca de su experiencia.” En este punto, cualquiera que quiera hablar puede hacerlo. Además, tome notas de las respuestas y realice preguntas tales como: “¿Cómo se las arregló para hacer eso?”. Expresé sorpresa diciendo cosas como “¡Qué bien!” cuando los participantes describan lo que han aprendido de su experiencia. Después, pregunte: “¿De qué manera cree que puede incorporar estos ejercicios a su vida?”

#### 3. Discutir de forma adecuada (15 minutos)

Enuncie, “En las últimas sesiones, nos hemos centrado en describir cómo los pensamientos, emociones y comportamientos están interrelacionados y hemos discutido estrategias que pueden utilizar para realizar cambios positivos en estos temas. Tal y como discutimos en sesiones anteriores, los pensamientos y emociones son neutrales. Mientras que es importante aprender a controlarlos de manera efectiva, también es importante ser capaz de comunicárselos a los demás porque para ellos, son invisibles. Hoy, me gustaría hablar con ustedes acerca de cómo pueden comunicarse de manera efectiva con los miembros de su familia. Más tarde en la sesión discutiremos algunas estrategias para promover una comunicación sana. La comunicación implica hablar y escuchar. El objetivo es la expresión mutua y el entendimiento, más que el acuerdo.”

Explique, “Una forma de incrementar la probabilidad de que entienda correctamente lo que los miembros de su familia están diciendo es usar la escucha activa. Implica demostrar que está centrado en las palabras del hablante a través del lenguaje corporal o breves respuestas vocales que enfatizan su interés. La escucha activa incluye, alentar, parafrasear y formular preguntas abiertas. Asentir con la cabeza o decir cosas tales como <<Entiendo>>, son ejemplos de una forma de alentar. Puede utilizarlos

cuando sea apropiado. De nuevo, el objetivo debe ser el entendimiento, **no el acuerdo**. Puede también usar el parafraseado o preguntas abiertas cuando sea apropiado. Si un ser querido dice <<Estoy tan frustrado con José porque no se pone a buscar un trabajo>>, podría responder <<Estoy escuchando que estás frustrado porque José no encuentra trabajo. ¿Cómo lo estás viviendo?>> Aunque pueda ser tentador expresar sus pensamientos acerca de cómo arreglar la situación, algunas personas pueden pensar que eso no es de ayuda.

Agregue: “Hemos estado hablando acerca de cómo tener una comunicación saludable. Mucha gente piensa que un conflicto no es saludable o es dañino para las relaciones. Aun así, dar a conocer los roces puede ser una de las cosas más saludables que alguien puede hacer en una relación. Es importante que sigan específicamente las pautas para asegurarse de que realizarán la queja de manera que su pareja los pueda escuchar.”

Suministre a los participantes la hoja de trabajo titulada “Discutir de Forma Adecuada”. Revise cada paso.

#### 4. Signos de Peligro de Comunicación (15 minutos)

Enuncie: “En este momento, me gustaría hablar con ustedes acerca de algunas formas de comunicarse que pueden dañar sus relaciones. Se trata de los signos de peligro de la comunicación.”

Distribuya a los participantes el documento “Signos de Peligro de la Comunicación” y agregue, “Como pueden ver aquí, hay cuatro tipos de signos de peligro en la comunicación y algunos ejemplos ilustrativos. Criticar implica atacar la personalidad o el carácter de la persona querida, en vez de centrarse en el comportamiento específico que le molesta. Desprecio implica menospreciar o insultar al miembro de su familia. La actitud defensiva implica intentar resguardarse de un posible ataque, negando la responsabilidad, utilizando excusas o sobreponiendo una queja a la otra. Por último, la actitud obstruccionista implica no escuchar las quejas de la otra persona. Tomen un momento para leer estos ejemplos”

Cuando los participantes terminen de leer el folleto, entrégueles los folletos denominados “Signos de Peligro durante la Comunicación”.

Explíquelo de la siguiente manera: “En esta página hay tres situaciones, cada una simula una señal de peligro diferente.” Permita que cada participante lea en voz alta cada situación.

Después, pida que cada uno de los participantes diga su versión de lo que vieron. Indague con preguntas como las siguientes: “¿Qué han visto u oído que les haga pensar que esta familia estaba incurriendo en \_\_\_\_\_?” y/o “Cuando \_\_\_\_\_ dijo

\_\_\_\_\_, ¿qué tipo de señal de peligro les sugiere?” Para ampliar la conversación y asegurarse que todos los participantes pueden identificar las cuatro señales de peligro en comunicación.

Continúe añadiendo: “Estos signos de peligro están relacionados con dinámicas familiares que pretenden destruir a su familia y arruinar las relaciones. Es importante reconocer los efectos que estos peligros de la comunicación pueden tener en las relaciones que tienen entre ustedes, y unirse para combatirlos.”

Inicie una discusión con ejemplos más personales diciendo, “¿Por qué no hablar sobre las veces que advirtió estos signos de peligro en la comunicación y fue capaz de prevenir que dañaran su relación?” Acuérdesse de usar externalización cuando hable de signos de peligro (ej. “¿Cuándo es el desprecio un problema?” o “¿Cómo puede prevenir la actitud defensiva para que no dañe su familia?”). Intervenga cuando sea necesario para reducir conceptos que no ayudan.

#### 5. Estrategias para combatir los signos de peligro en la comunicación (40 minutos)

Explique: “A veces cuando las personas que tienen una relación afectiva están manteniendo una conversación sobre un tema candente, responden con rodeos de manera negativa, elevando el tono continuamente a medida que la conversación se torna más volátil. Además, pueden menospreciar la experiencia de la otra persona diciendo cosas como <<Deja de compadecerte de ti mismo>> o <<No puede ser tan malo>>. Aunque este tipo de afirmaciones pueden ser un intento de calmar a un ser querido, están comunicando el mensaje de que la persona no está autorizada a sentirse de una manera

concreta. Ahora vamos a hablar acerca de estrategias para una comunicación saludable. Por ejemplo, usar afirmaciones y la técnica del hablante-escucha pueden ser de ayuda cuando intentamos realizar una queja de manera que nos brinde resultados beneficiosos.”

Reparta a los participantes la hoja de trabajo titulada “Afirmaciones ‘Yo’”. Explique, “Muchas veces, la manera en la que los individuos encaran los temas más difíciles puede marcar una diferencia significativa en si consiguen una solución satisfactoria o no. Deberían intentar explicar su queja, en vez de echarle la culpa a la otra persona. Cuando los individuos se expresan con agresividad como <<Nunca me dices que me quieres>>, la otra persona puede ponerse a la defensiva, lo que hace que sea difícil para los dos resolver el conflicto. De todos modos, si la persona se expresa con más sutileza como: <<Me siento triste cuando no me dices que me quieres, y me gustaría que tú me lo dijeras más a menudo>>, la atención está en el contenido emocional de la queja, que es neutral. Además, la persona que se queja está diciéndole a la otra que puede hacerlo de manera distinta para cambiar la situación. Esto hace que sea más probable que la otra persona conteste de manera positiva y que el cambio ocurra”.

Distribuya la hoja de trabajo titulada “Utilizando Afirmaciones Yo’”. Haga una revisión y permita que los participantes trabajen en ello y compartan las respuestas cuando terminen.

Distribuya a los participantes la “Técnica del Hablante/Escucha”. Explique, “La técnica del hablante-escucha es otra estrategia que permite a los individuos poner voz a sus quejas de una manera tal que es más probable que lleve a una solución satisfactoria del problema. Incluye una comunicación estructurada entre dos personas. El individuo toma turnos en los roles de hablante y de escucha. También hay reglas para continuar promoviendo la comunicación saludable.” Examine la hoja de trabajo detenidamente con los participantes.

Después agregue, “En este punto, me gustaría que se pusieran en parejas y practicaran esta técnica. Para esta sesión, elijan un tema que no sea conflictivo, dado que estoy más interesado en que aprendan el proceso de la técnica.”

**Nota:** Si hay un número impar de participantes, haga que uno de los grupos sea compuesto por tres miembros de la familia. Deje a los participantes 5-10 minutos para practicar esta técnica. Vaya de grupo en grupo para monitorizar los ejercicios. Si es necesario, intervenga para asegurar que los participantes completan los ejercicios con exactitud. Las preguntas socráticas pueden ser una herramienta útil aquí. Por ejemplo, si se da cuenta de que un oyente no parafrasea con exactitud, pregúntele al orador si el oyente ha capturado lo que intentaba decir.

## 6. Explicar las tareas para realizar en el hogar (5 minutos)

Concluya la sesión agradeciendo a los asistentes por su compromiso y participación. Distribuya la hoja de trabajo para explicar la tarea para realizar en el hogar y solicite: “A partir de este momento y hasta la siguiente vez que nos reunamos, me gustaría que practicaran la técnica del hablante-escucha tres días distintos durante 30 minutos cada vez. Después de haber completado el ejercicio, me gustaría que reflexionaran sobre la experiencia y que tomaran notas para compartir en la siguiente sesión. Específicamente, me gustaría que se focalicen en las actividades que fueron fáciles y difíciles en el ejercicio. Basado en esa información, me gustaría que determinen cuáles son sus puntos fuertes y cuáles son los que necesitan fortalecerse en la comunicación.”

Al final de cada sesión por favor tome 2 minutos para preguntar a los participantes si ha cambiado el sentido de la frase.

*Una gran manera de saber manifestarse es la de, primero, saber escuchar y, segundo, saber hablar.*

—Rene Descartes

## Situaciones de Peligro en la Comunicación

Las situaciones que se describen a continuación están diseñadas para ilustrar las cuatro señales que ponen en peligro la comunicación (crítica, desprecio, posición defensiva y evasiva). Cada situación representa una de las cuatro señales de peligro. No obstante, aunque las situaciones estén separadas para describir una señal de peligro específica, se consideran como segmentos de una misma historia.

### Crítica

José y Alicia están sentados tranquilamente en un sofá mirándose. Parece que estuvieran frustrados y tristes debido a que ambos tienen el ceño fruncido y están sentados con los brazos cruzados.

Hay un periódico sobre el sofá cerca de José. Alicia le dice con un tono de voz exasperada y estridente, “No sé cómo hemos llegado a este punto. Fuimos tan felices. Ahora parece que llevarse bien es todo un esfuerzo, no tendría que ser tan difícil.”

José responde con calma, “Yo también lo he pensado bastante, parece que no hay más diálogo entre nosotros.”

Alicia se pone más exasperada y le contesta, “Bueno, ¿y se te ocurrió alguna idea esclarecedora?, Yo no tengo ninguna. Parece que ya hemos probado todas.”

José agrega: “Éramos tan felices.” Hace una pequeña pausa y después continúa, “Creo que han ocurrido cosas que no habíamos previsto, lo que no ha sido de ninguna ayuda, YO no sé qué otra cosa podemos hacer.”

Alicia ahora está enojada y expresa de forma intempestiva, “Desearía que las cosas fueran como antes.” José, sintiéndose un poco preocupado, pregunta de buena manera: “¿Qué quieres decir con eso?”. Alicia responde con un tono acusativo hablando más rápido que antes, “Cuando empezamos a salir juntos íbamos a bailar una vez por semana. Salíamos a cenar y me regalabas flores.” Le reprocha. “NUNCA salimos a pasear o haces cosas agradables para mí. Es como si no me amaras más.”

José responde: “Pero yo me esforcé, anoche hasta lavé los platos.” Alicia le responde de mala manera, “Por favor, ¿crees que lavar unos platos hace alguna diferencia? Encima los lavaste tan mal que tuve que lavarlos de nuevo.”

### Desprecio

José y Alicia todavía están sentados en el sofá. Alicia parece enojada, mientras que José está sorprendido. José dice: “No sabía que esos eran tus sentimientos.”

Alicia contesta sorprendida e indignada, “SÍ, siempre me demostrabas cuánto yo te importaba. Ahora, creo que simplemente te volviste un vago.” José está sorprendido y le dice, “Sinceramente, no tenía ni idea de lo que estabas pensando.” Ahora Alicia se levanta y está visiblemente enojada. Ella alza su tono de voz. “¿Me estás tomando el pelo? No puedo creer que te esté diciendo esto. ¿Eres estúpido? Solíamos salir juntos, me regalabas flores y me decías que me amabas.”

“Me siento estafada. Creí que me había casado con un hombre atento y romántico. Pero lo que conseguí es un niño patético.” José la mira y todo lo que puede decir es “Por Dios.” Alicia continúa enojada, “Perdona, pero eres lamentable. No sé por qué me casé contigo, Honestamente, no vales nada.”

### Actitud defensiva

Alicia todavía está de pie y José todavía está sentado en el sofá mirándola enojado. José se levanta para mirarla a los ojos y agrega enojado subiendo el tono de su voz. “Sí, pero cuando salimos estás siempre quejándote de que estás cansada o de que te duelen los pies.”

“Honestamente, me rindo.” Alicia ahora está indignada. Pone una mano sobre su pecho y grita. “¡Yo nunca me quejo cuando salimos!” Ella le apunta a José “**TÚ** eres el que siempre está quejándose de lo caro que está todo cada vez que salimos.” José levanta ambos brazos como haciéndole una pregunta al techo y le grita “Bueno, ¿cómo no me voy a preocupar por el dinero? Yo soy el que tiene que trabajar todo el día”.

“Todo lo que tú haces es gastar todo mi dinero. Si no gastaras tanto dinero en otras cosas, ¡podríamos salir más a menudo!”. Alicia está colérica y empuja a José con ambas manos. “No trates de echarme la culpa de esta situación. Es **TU** culpa que hayamos llegado a este punto.” José responde con tristeza, “¿Por qué te has ensañado conmigo hoy?”.

### **Evasivas**

Ahora José y Alicia están parados uno frente al otro con cara de enojados. Alicia dice en tono exasperado pero firme: “Sólo trato de ser honesta. Las cosas tienen que cambiar.” José se cruza de brazos sobre el pecho.

“Mmmm, mmmm.” Se queda parado unos 10 segundos en silencio. Suspira. Alicia extiende los brazos hacia él y le implora, “¿Si le pusiéramos un poco más de empeño...?”, pero José la interrumpe de manera despectiva diciendo; “Sí, seguro.” Físicamente se da vuelta alejándose de ella y le dice, “Lo que sea.”

Alicia agita los brazos delante de él para llamar su atención. “Hola, mírame ¿vas a contestarme?”. José no se da vuelta para mirarla, pero le señala, “De cualquier manera lo que yo diga, no tiene importancia para ti.” Levanta el periódico y se sienta en el sofá. Alicia levanta los brazos mascullando enojada mientras se retira drásticamente, “Bueno, es obvio que no quieres hablar más sobre este asunto.” José permanece sentado en el sofá sacudiendo la cabeza.

## Discutir de forma adecuada

1. **TOMAR RESPONSABILIDAD.** Sólo se necesita una persona para terminar un conflicto. Incluso aunque un miembro de la familia no esté de acuerdo en discutir de manera adecuada, puede comprometerse a evitar dañar intencionadamente los sentimientos de sus seres queridos utilizando las reglas que se detallan a continuación. Después, si a pesar de sus esfuerzos, se da cuenta de que la discusión se está saliendo de control, aléjese utilizando las sugerencias en la regla 4.
2. **EVITAR LA ESCALADA EMOCIONAL.** Cuando las personas nos dañan, es natural que queramos devolverles el daño. De todos modos, empieza un interminable ciclo de escalada emocional, a medida que cada persona trata de herir a otra porque él/ella ha sido herido. Para discutir de forma adecuada se debe evitar esa escalada emocional cuando hieren sus sentimientos. Si alguna de las partes continúa hablando o actuando de manera perjudicial, aléjese, en vez de pagarle con su misma moneda. Haga lo mejor que pueda para mantenerse tranquilo.
3. **UTILICE LAS AFIRMACIONES “YO”.** Hable sobre sus propios sentimientos. Si intenta decirle al miembro de su familia qué es lo que siente, quiere decir, o lo que está haciendo, pronto la discusión se centrará en quien tiene razón, en vez de centrarse en el problema que es lo que realmente importa.
4. **APRENDA A ALEJARSE PRODUCTIVAMENTE.** Si a pesar de sus mejores esfuerzos continúan las acciones o discursos perjudiciales, tomase un tiempo fuera.
5. **EVITE Y PREVEA UN DISCURSO PERJUDICIAL.** Esto incluye insultar, sarcasmo dañino, levantar la voz y otras formas de hostilidad verbal o intimidación. Cuando alguna de las partes diga algo perjudicial, acuerde con su familiar utilizar una frase clave que indica que él/ella ha dañado sus sentimientos. Si su ser querido continúa a pesar de sus avisos, puede que sea momento de alejarse.
6. **SER TAN ESPECÍFICO COMO SE PUEDA CON EJEMPLOS.** No realice quejas vagas. Trate de dar ejemplos concretos- quién, cuándo, dónde- sobre a lo que se refiere. No generalice utilizando palabras tales como *siempre* o *nunca*. Siempre hay excepciones para todo.
7. **DISCUTA SOBRE UN PROBLEMA A LA VEZ.** Muchas familias almacenan varios problemas y los sacan todos a la vez en una gran pelea, lo cual es confuso. No empiece con nuevos temas hasta que se haya terminado de debatir uno de ellos.
8. **NO ESPERE,** trate de enfrentarse a los problemas tan pronto surgen antes de que se empiecen a herir los sentimientos.
9. **PARTICIPE ACTIVAMENTE.** Cuando una persona está en silencio y deja de responder a la otra, la frustración y la ira pueden aparecer. Los resultados positivos sólo pueden conseguirse con una comunicación bidireccional.

## Signos de Peligro en la Comunicación

- ✓ La **crítica** implica atacar la personalidad o el carácter del ser querido en vez de centrarse en el comportamiento específico que le molesta. Incluye realizar generalizaciones como “*Tú siempre...*” y “*Tú nunca...*”
  - Crítica: “*Siempre* dejas tu ropa sucia en el suelo. Eres tan vago.”
  - Saludable: “Me enfada mucho cuando llego a casa y veo tu ropa sucia en el suelo.”
- ✓ El **desprecio** implica menospreciar o insultar a un miembro de la familia. Es un signo de falta de respeto. Incluye hacer críticas demoledoras de un miembro de su familia o burlarse.
  - Desprecio: “Si piensas que *tu madre es tan buena cocinera* porque no vas a vivir con ella. Eres patético. Eres poco hombre.”
  - Saludable: “Me siento herido/a cuando dices que tu madre es mejor cocinera que yo.”
- ✓ La **actitud defensiva** es un intento de resguardarse ante un posible ataque. Cuando la gente está con esa actitud, normalmente está tensionada y tiene dificultades para escuchar lo que se les está diciendo. Incluye negar responsabilidad, poner excusas, o mezclar las quejas unas con otras.
  - Actitud Defensiva: “¿Cuándo crees exactamente que puedo tener tiempo para ayudar en las tareas domésticas?, ¡Trabajo todo el día!”
  - Saludable: “Estoy escuchándote decir que te gustaría que ayudase más en las tareas domésticas.”
- ✓ El **obstruccionismo** implica no escuchar las quejas de la otra persona (física o emocionalmente). En vez de utilizar la escucha activa, la persona puede que deje la habitación, empiece a hacer otras cosas o simplemente diga “*aja*” repetidamente.

---

## RECURSO

---

1. Gottman J. *Why Marriages Succeed or Fail... and How You Can Make Yours Last*. New York: Simon & Schuster; 1995.

## Afirmaciones Yo

Las “afirmaciones yo” son una manera efectiva de comunicación que mantiene el respeto y previene a la persona que las recibe de sentirse atacada. Estas afirmaciones tienen una estructura específica con las siguientes cuatro partes:

1. Siento (*describa sus emociones*).
2. Cuando (*describa el comportamiento asociado a sus emociones*).
3. Porque (*el impacto que el comportamiento tiene en usted*).
4. Me gustaría (*describa el cambio de comportamiento que le gustaría ver*).

Por ejemplo, digamos que prepara una buena comida pero el miembro de su familia llega tarde a casa sin haber llamado con antelación para avisarle. Estaba esperando comer a cierta hora y cuando el miembro de tu familia no llegó, cambió sus planes. Sería fácil decirle al miembro de su familia: “Estoy enojado contigo porque no me llamaste. Es tu culpa que la cena se haya arruinado. ¡Eres un idiota egoísta!” De todos modos, esa frase automáticamente hace que la otra persona se ponga a la defensiva y no ofrezca ninguna solución.

Considera utilizar una afirmación “Yo” como:

“Me siento decepcionado cundo no recibo una llamada diciendo que vas a llegar tarde porque me preocupa que no me valores. Me gustaría que me llamaras para decirme que vas a llegar tarde.”

## Recuerde la fórmula:

Siento (*emoción*) cuando (*comportamiento*) porque (*impacta en ti*).  
Me gustaría (*cambio de comportamiento*).

**Utilizando Afirmaciones “Yo”**

Por favor, reformule las siguientes afirmaciones de queja:

1. Siempre te pones de parte de tu madre. Eres un niño de mamá.

---

---

2. No puedo creer que no me llamasen para decirme que venías tarde a cenar. Eres un desconsiderado.

---

---

3. ¿Cuántas veces tengo que decirte que pongas tu ropa sucia en el cesto? Es como estar hablando con un niño de cuatro años.

---

---

4. Nunca me dices que me quieres. ¿Cómo puedes ser tan poco afectuoso?

---

---

5. Desearía que fueras más como Juan. Fue a la escuela y tiene un gran trabajo. Simplemente no entiendo cómo puedes estar sentado todo el día sin hacer nada.

---

---

## La técnica del Hablante-Escucha

La técnica del hablante-escucha es una herramienta útil que compensa los estilos destructivos de comunicación. La estructura es útil para tener una comunicación abierta y clara, lo que ayuda a un acercamiento entre usted y su ser querido. Cuando se usan estas reglas y técnicas regularmente para tratar los conflictos en las relaciones, también se puede desarrollar un aumento en la confianza.

### Reglas para el hablante:

1. *Hable usted mismo.* Utilice “afirmaciones yo” y hable sobre sus sentimientos.
2. *No haga un monólogo largo.* Para ayudar a la escucha mantenga las exposiciones breves y centradas en el tema.
3. *Pare y deje parafrasear al oyente.* Deje al oyente que diga con sus propias palabras lo que cree que ha escuchado. Si su parafraseado no es exacto, corríjale con tacto y explíquele lo que quiere decir. Su objetivo es ayudar al oyente a escuchar y entender su punto de vista.

### Reglas para el que escucha:

1. *Parafrasea lo que oye.* Repita brevemente lo que escucha con sus propias palabras. Asegúrese de que entiende lo que se ha dicho.
2. *Céntrese en el mensaje del orador. No refute.* En el rol de escucha, no debe ofrecer opiniones o pensamientos. Espere a que sea el orador para dar su respuesta. Como oyente, su trabajo es hablar sólo para entender a su compañero.
3. Use el Método LND–Escucha, No te Defiendas (Listen, **D**on’t **D**efend, LND por sus siglas en inglés).

### Reglas para ambos:

1. El orador tiene la palabra.
2. El orador mantiene la palabra mientras el oyente parafrasea.
3. Compartir la palabra.
4. Use el Método LND –Escucha, No te Defiendas

---

## RECURSO

1. Stanley SM, Blumberg SL, Markman HJ. Helping couples fight for their marriages: The PREP approach. In: Berger R, Hannah M, eds. *Handbook of Preventive Approaches in Couple Therapy* (pp. 279-303). New York: Brunner/Mazel; 1999.

**Tarea para Realizar en el Hogar: La Técnica del Hablante-Escucha**

Antes de nuestra próxima sesión, practique la técnica del hablante-escucha en tres días diferentes durante 30 minutos cada vez. Utilice el espacio de abajo para reflexionar sobre su experiencia y tome notas para compartirlas en la siguiente sesión. Por favor, céntrese en lo que cree que es fácil y lo que cree que es difícil. Basándose en esta información ¿Cuáles son sus puntos fuertes en la comunicación y en qué áreas ha crecido?

Fecha: \_\_\_\_\_

Experiencia:

---

Fecha: \_\_\_\_\_

Experiencia:

---

Fecha: \_\_\_\_\_

Experiencia:

---

## Sesión Seis

### Buscando Soluciones

#### Materiales

- ✓ Impresos.
- ✓ Cuaderno de notas y bolígrafo para tomar notas de respuestas particulares.
- ✓ Caballete grande con papel o pizarra blanca.
- ✓ Rotuladores.

#### Resumen

El objetivo de esta sesión es enseñar a los pacientes a formular soluciones a los problemas. Se trata de que realicen la transición de hablar sobre los problemas a hablar sobre las soluciones. Se proporcionará psicoeducación sobre la formulación de objetivos y el progreso realizado en dichos objetivos. Se dará tiempo para practicar durante la sesión.

#### Índice del plan de trabajo

| Contenido                                                         | Duración Sugerida<br>(Total 90 minutos) |
|-------------------------------------------------------------------|-----------------------------------------|
| 1. Exposición de la frase                                         | 5 minutos                               |
| 2. Repaso de la tarea para realizar en el hogar                   | 10 minutos                              |
| 3. Transición de hablar sobre problemas a hablar sobre soluciones | 20 minutos                              |
| 4. Formulando objetivos                                           | 5 minutos                               |
| 5. Buscando soluciones                                            | 10 minutos                              |
| 6. Seguimiento del progreso                                       | 10 minutos                              |
| 7. Unir todo                                                      | 25 minutos                              |
| 8. Explicar la tarea para realizar en el hogar                    | 5 minutos                               |

#### 1. Exposición de la frase (5 minutos)

Diga: “Como hicimos la semana anterior, empezaremos la sesión reflexionando sobre una frase relevante”. Proporcione a todos los participantes una copia de la frase y solicite: “Por favor, lean la siguiente frase”. Permita el tiempo necesario para ello.

No podemos resolver problemas pensando de la misma manera que cuando los creamos.

—Albert Einstein

Prosiga: “Me gustaría que ahora reflexionaran sobre lo que esta frase significa para ustedes y cómo puede ser relevante en su situación”. En este punto, quien quiera que desee hablar puede hacerlo. Verifique si las personas que no han participado tendrían algo para añadir. Cuando los participantes hayan acabado de reflexionar sobre la cita, plantee lo siguiente: “Cuando nos enfrentamos a los problemas, muchas veces nos sentimos bloqueados. A menudo, intentar ver las cosas desde diferentes perspectivas es útil para buscar nuevas soluciones.”

#### 2. Repaso de la tarea para realizar en el hogar (10 minutos)

Recuérdelos: “La última vez que nos vimos, les pedí que practicasen la técnica del hablante-escucha 3 días diferentes durante 30 minutos y que tomaran nota de cada experiencia. Ahora me gustaría escuchar cuáles fueron esas experiencias, específicamente si notaron que su forma de comunicarse es efectiva. En este punto, quien quiera que desee hablar puede hacerlo. Verifique si aquellos que no han contestado quieren añadir algo más. También, tome notas de las respuestas citándolas literalmente. Pregunte cosas como, “¿Cómo consiguió hacer eso?” Cuando individuos con LM/TCE y/o sus familiares dialogan sobre las maneras en las que superan los desafíos de la LM/TCE, exprese sorpresa con comentarios como “¡Qué bueno!”. Entonces, pregunte “¿Qué mejoró cuando se comunicó de esta manera?, ¿Cómo planea continuar?”

#### 3. Transición de hablar sobre problemas a hablar sobre soluciones (20 minutos)

Informe: “Poseen ahora las herramientas que les permitirán comunicarse con más eficacia para expresar sus pensamientos y sentimientos. Además, estas habilidades les permitirán trabajar con sus familiares y otros para buscar soluciones a los problemas. Puede ser abrumador tanto para los individuos como para los familiares cuando creen que han hecho todo lo posible para solucionar un problema y no obtienen ningún resultado. Una razón por la que tienen dificultades encontrando soluciones eficaces es que están demasiado preocupados por el

problema y, como resultado, se centran demasiado en hablar sobre los problemas. Ejemplos de esto incluyen:

- Buscar la causa del problema;
- Tratar de determinar quién es el culpable;
- Centrarse en qué más ha ido mal;
- Tratar de reconstruir cómo pudo ocurrir el problema; y
- Tratar de descubrir por qué no ha sido aún resuelto.

Cuando las personas participan en estas conversaciones, el sentimiento de culpa y el estar a la defensiva pueden poner trabas a sus habilidades para trabajar conjuntamente para buscar soluciones. En estos casos, el pesimismo hace que el problema se consolide o incluso se intensifique.”

Afirme: “Aunque pueda parecer que hayan intentado todo para solucionar el problema, en realidad, muchos individuos y familias sólo han intentado unas pocas de las soluciones disponibles en sus repertorios. A veces, la solución más lógica al problema puede ser inefectiva; por lo tanto, el sujeto y la familia deben buscar soluciones creativas para superar sus retos. Tales soluciones pueden no estar relacionadas al problema o incluso parecer irracionales.”

Continúe: “Frecuentemente, el problema no es el problema; la solución es el problema. A veces, la familia niega el problema real, como por ejemplo, negar el abuso de sustancias de un familiar. En tales casos, la solución debería suponer una acción. La familia también podría tratar de solucionar un problema no existente, como por ejemplo, castigar a un miembro de la familia por masturbarse a solas en su habitación. En tales casos, la solución debería implicar la inacción. Finalmente, la familia podría tomar la acción incorrecta, como, por ejemplo, darle regalos a un familiar, en vez de darle atención. En tal caso, la solución debería suponer una acción diferente.

A veces pensamos que como los problemas parecen abrumadores o vienen de hace tiempo, las soluciones también deben de ser complejas y llevar mucho tiempo. Sin embargo, esto podría no ser verdad. En muchos casos, la familia ya está utilizando una solución al menos parcialmente efectiva, aunque podría no ser evidente porque el problema parece demasiado abrumador.”

Escriba lo siguiente en una hoja en blanco: “Si algo no funciona, deja de hacerlo. Si algo funciona, hazlo más a menudo.”

Expresa: “Es importante que las familias sean capaces de buscar otra solución cuando la que están implementando no funciona.”

Continúe diciendo, “Además de evitar usar soluciones inefectivas y continuar usando las efectivas, es útil pasar de hablar sobre los problemas a hablar sobre las soluciones. Hablar sobre las soluciones implica centrarse en lo que quiere que ocurra en vez de en el problema y así buscar la solución, convirtiéndose ésta en su objetivo. Una forma de empezar a hacer esto es responder a la pregunta milagro”. Entregue la hoja de trabajo titulada “Pregunta Milagro” a los participantes y léalo en voz alta. Haga que los participantes completen la hoja de trabajo con el fin de que piensen en sus objetivos.

Cuando todos hayan completado la hoja de trabajo exprese: “Me gustaría que sigan practicando la tarea de dialogar sobre las soluciones”.

Distribuya la hoja de trabajo titulada “Hablar sobre los Problemas VS Hablar sobre las Soluciones” y explique cómo los dos primeros ítems están completados y sirven como ejemplos. Facilite tiempo a la familia para que lo complete.

**Nota:** Si los participantes tienen dificultades para hablar sobre las soluciones, proporcione los siguientes ejemplos:

1. Siempre nos peleamos. He intentado todo lo posible para mejorar la situación pero nada funciona  
 ➡ Quiero que nos llevemos bien.
2. No puedo hacer ejercicio porque tengo que cuidar de demasiadas cosas y nadie me ayuda  
 ➡ Quiero sacar algo de tiempo durante la semana para hacer ejercicio.
3. Mi hijo siempre me ignora y actúa como si yo no estuviera ahí. Nunca me escucha.  
 ➡ Quiero que mi hijo me escuche y me respete.
4. Nuestro matrimonio no es lo que solía ser. Tengo miedo de que acabemos divorciándonos.  
 ➡ Quiero que nuestro matrimonio sea más saludable.

10. Soy una persona muy fácil de convencer. Constantemente dejo que la gente me pisotee.  
 ➡ Quiero ser más asertiva y no permitir que la gente se aproveche de mí.
11. Mis relaciones amorosas nunca funcionan.  
 ➡ Quiero mejorar mis habilidades para mantener relaciones amorosas exitosas.
12. Nunca tendré una vida normal debido a mi lesión.  
 ➡ Quiero trabajar, ir a la escuela y tener una familia.
13. Siempre me siento triste y estresada  
 ➡ Quiero sentirme feliz y relajada.

#### 4. Formulando objetivos (5 minutos)

Diga: “Se habrá dado cuenta de que cuando deja de hablar sobre los problemas y en cambio empieza a hablar sobre las soluciones, es capaz de identificar objetivos con más facilidad. Formular objetivos efectivos es un paso crucial en la búsqueda de soluciones.”

Distribuya la hoja de trabajo titulada “Formulando Objetivos Útiles” y revíselo con la familia.

#### 5. Buscando soluciones (10 minutos)

Una los objetivos BAMS (Behavioral=comportamentales, Achievable=alcanzables, Measurable=medibles, Specific=específicos; BAMS por sus siglas en inglés) con la búsqueda de soluciones diciendo: “Como he mencionado, formular objetivos útiles es un paso crucial para buscar soluciones. Una vez que ha pasado de hablar sobre los problemas a hablar sobre las soluciones y ha formulado los objetivos, es más fácil dar con las soluciones potenciales. El siguiente enfoque proporciona una estructura adicional en la búsqueda de soluciones.”

Entregue a los participantes la hoja de trabajo titulada “Buscando Nuevas Soluciones” y explíquelo. Distribuya, entonces, la hoja de trabajo titulada “Buscando Nuevas Soluciones-Ejemplo” y explíquelo.

#### 6. Seguimiento del progreso (10 minutos)

Continúe explicando: “Tal y como hemos planteado, es importante que los objetivos sean específicos, comportamentales, medibles

y alcanzables. Tales características le permiten determinar cuánto progreso está haciendo en sus objetivos usando preguntas de escala en una escala del 1 (en absoluto) a 10 (completamente).”

Distribuya la hoja de trabajo titulada “Seguimiento del progreso” y explíquelo.

Diga: “Una manera de enfocar este ejercicio es empezar con 10. Esto debería representar el alcance completo del objetivo. Muévanse entonces al 1. Esto debería representar no alcanzar en absoluto el objetivo. Muévanse entonces al 5, el cual debería representar el punto medio entre no alcanzar el objetivo y alcanzarlo completamente. Finalmente retroceder al 1 y añadir pequeños pasos para cada punto en el continuo utilizando el 1, el 5 y el 10 como referencias. Una vez que hayan completado esta hoja de trabajo tendrán una guía paso por paso sobre cómo lograr sus objetivos a lo largo del tiempo. También, les permitirá ver que lograr su objetivo es menos abrumador de lo que pensaron. Cuando vean que están avanzando hacia su objetivo, es más probable que sigan trabajando en ello.”

#### 7. Unir todo (25 minutos)

Distribuya la hoja de trabajo titulada, “Práctica: Objetivos y soluciones” y diga: “Ahora es el momento de unir todo. Como familia, piensen en algún desafío que estén afrontando en este momento. Completen esta hoja de ejercicios para practicar estas estrategias.”

#### 8. Explicación de la tarea para realizar en el hogar (5 minutos)

Despida la sesión agradeciendo a los asistentes el compromiso y la participación. Distribuya la hoja de tarea para realizar en el hogar y agregue: “A partir de este momento y hasta la siguiente sesión, me gustaría que practicasen lo que han aprendido. Durante la siguiente semana, piensen en un reto que estén afrontando y completen esta hoja de ejercicios.”

Al final de cada sesión por favor tome 2 minutos para preguntar a los participantes si ha cambiado el sentido de la frase.

*No podemos resolver problemas pensando de la misma manera que cuando los creamos.*

—Albert Einstein

**Pregunta Milagro**

Suponga por un momento que un milagro ocurre durante la noche y el problema que están afrontando usted y su familia se soluciona. Sin embargo, como estaba durmiendo, no sabe que el milagro ocurrió.

1. Cuando se levante mañana por la mañana, ¿cuál sería la primera señal que notaría que le hiciera saber que ocurrió un milagro?
2. ¿Quién en su vida notaría este cambio?
3. ¿Cuál sería el primer paso que tendría que dar para que el milagro se haga realidad?
4. ¿Qué elementos de este milagro están ocurriendo ya?

## Hablar sobre Problemas vs Hablar sobre Soluciones

A continuación, hay una lista de afirmaciones “hablando sobre problemas”. Al lado de cada una de esas afirmaciones, escribe una afirmación alternativa centrada en las soluciones. Se proporcionan dos ejemplos.

| Hablar sobre Problemas |                                                                                                             | Hablar sobre Soluciones |                                                               |
|------------------------|-------------------------------------------------------------------------------------------------------------|-------------------------|---------------------------------------------------------------|
| 1.                     | José nunca ayuda con ninguna tarea doméstica.                                                               | ⇒                       | <i>Me gustaría que José fuera más útil en la casa.</i>        |
| 2.                     | Nunca podemos divertirnos porque Julia necesita demasiada supervisión.                                      | ⇒                       | <i>Me gustaría que tuviéramos más diversión como familia.</i> |
| 3.                     | Todo lo que hacemos es pelearnos. He probado todo lo posible para mejorar la situación, pero nada funciona. | ⇒                       |                                                               |
| 4.                     | No puedo hacer ejercicio porque tengo que hacer demasiadas cosas y nadie me ayuda                           | ⇒                       |                                                               |
| 5.                     | Mi hijo siempre me ignora y actúa como si yo no estuviera ahí. Nunca me escucha.                            | ⇒                       |                                                               |
| 6.                     | Nuestro matrimonio no es lo que solía ser. Tengo miedo de que acabemos divorciándonos.                      | ⇒                       |                                                               |
| 7.                     | Soy una persona muy fácil de convencer. Constantemente dejo que la gente me pisotee.                        | ⇒                       |                                                               |
| 8.                     | Mis relaciones amorosas nunca funcionan.                                                                    | ⇒                       |                                                               |
| 9.                     | Debido a mi lesión nunca tendré una vida normal.                                                            | ⇒                       |                                                               |
| 10.                    | Siempre me siento triste y estresada                                                                        | ⇒                       |                                                               |

## Formulando Objetivos Útiles

Los objetivos útiles tienen las siguientes características:

- ✓ **COMPORTAMENTALES (Behavioral):** Son aquellos que pueden definirse en términos comportamentales. Los objetivos útiles son aquellos que pueden describirse en términos de comportamiento.
  - Afirmar “*Quiero dejar de tener malos hábitos*” no proporciona ninguna descripción de lo que se va a hacer, haciéndolo más difícil de conseguir.
  - Puede hacer este objetivo más asequible en términos comportamentales incluyendo lo que puede hacer para ser sano. Por ejemplo, si quiere quitar los refrescos de su dieta, puedes decir: “*Quiero beber agua en todas las comidas*”.
- ✓ **ALCANZABLES (Achievable):** Los objetivos útiles son aquellos que pueden alcanzarse o completarse.
  - Afirmar “*Quiero que mi vida sea como era antes*”, puede que no sea alcanzable.
  - Puede hacer el objetivo más alcanzable modificándolo hacia algo más alcanzable: “*Quiero ser capaz de cocinar mis propias comidas*”.
- ✓ **MEDIBLES (Measurable):** Los objetivos útiles son aquellos que pueden medirse. Si no los puede medir, es difícil saber si ha alcanzado su objetivo.
  - Afirmar “*Quiero sentirme más feliz*” es difícil de medir porque es demasiado general.
  - Puede hacer el objetivo más medible incluyendo maneras en las que sepa si es más feliz: “*Quiero reírme al menos una vez cada día*”.
- ✓ **ESPECÍFICOS (Specific):** Los objetivos útiles son aquellos que no están definidos de manera vaga.
  - Afirmar, “*Quiero pasar más tiempo con mis hijos*” no es específico porque no dice cuánto tiempo quiere pasar con ellos ni cuándo quiere hacerlo.
  - Puedes hacer el objetivo más específico añadiendo los siguientes elementos: “*Quiero pasar al menos una hora diaria con mis hijos a partir de mañana.*”.

Aunque los ejemplos mencionados arriba se centran en cada característica por separado, los objetivos útiles incluyen las cuatro características.

### Recuerde:

Cuando formule objetivos, lo ideal es que sean objetivos BAMS. Los objetivos BAMS ayudan a medir más fácilmente su progreso hacia ellos.

**Buscando Nuevas Soluciones**

1. Comience a **HABLAR SOBRE SOLUCIONES** para determinar qué quiere que ocurra en lugar del problema y **FORMULE OBJETIVOS**.
2. Colectiva o individualmente, haga una **LLUVIDA DE IDEAS** de soluciones potenciales. No importa lo ilógicas o tontas que puedan parecer. Recuerde que no tienen que estar directamente relacionadas con el problema.
3. **EVALÚE** las posibles soluciones. Haga una lista de pros y contras para cada posible solución. Use la lista para decidir qué solución será la más efectiva.
  - ¿Cuál es la más práctica?
  - ¿Cuál es la que tiene menos contras y más pros?
4. **PONGA A PRUEBA** la nueva solución.

### Buscando Nuevas Soluciones-Ejemplo

A continuación, puedes ver cómo este enfoque de solución de problemas puede utilizarse.

✓ Hablar sobre problemas: *Estoy demasiado gorda*

1. Hable sobre soluciones: *Quiero hacer más ejercicio.*

2. Posibles soluciones:

1. Hablar con los compañeros de trabajo para empezar un grupo para caminar.
2. Hacer 100 saltos de tijera cada 3 horas.
3. Caminar 30 minutos por el vecindario tres veces a la semana.
4. Dormir 9 horas todas las noches.
5. Entrenarme para una maratón.
6. Comprar una cinta para caminar y usarla a diario durante 20 minutos.
7. Comenzar todos los días diciéndome a mí misma que soy una persona hermosa.
8. Tomar las escaleras en vez del ascensor.

3. Evalúe las posibles soluciones (para empezar, elige 2 posibles soluciones para evaluar)

Solución N°1: Caminar 30 minutos por el vecindario tres veces a la semana.

Pros: *Puedo hacerlo fácilmente.  
Tengo todo el equipamiento necesario.  
Sería agradable tomar algo de aire fresco.  
Vería más a mis vecinos.  
Puedo introducirlo fácilmente en mi rutina semanal.*

Contras: *Puede que el tiempo no sea bueno.  
Puede que me aburra.*

Solución N°2: Comprar una cinta para caminar y usarla a diario durante 20 minutos.

Pros: *Sería conveniente hacer ejercicio en mi casa en vez de trasladarme al gimnasio.  
El tiempo no impediría que hiciese ejercicio.*

Contras: *Una cinta de caminar cuesta mucho dinero.  
No tengo espacio para una cinta de caminar en mi casa.  
Puede ser aburrido.*

4. Intente una solución: *Andar 30 minutos por el vecindario tres veces a la semana.*

## Seguimiento del Progreso-Ejemplo

✓ Objetivos BAMS: *Quiero felicitar a mi hijo dos veces esta semana cuando haga su cama.*

Puede preguntarse a sí mismo las siguientes preguntas para ayudarse a evaluar su progreso en su nuevo objetivo.

En una escala del 1 (en absoluto) al 10 (completamente), ¿cuánto he alcanzado mi objetivo hasta el momento presente?:

1                      2                      3                      4                      5                      6                      7                      8                      9                      10

¿Cómo sería un 1? *No me he dado cuenta de si mi hijo ha hecho la cama algún día esta semana.*

¿Cómo sería un 2? *Me di cuenta que mi hijo hizo la cama de 1 a 4 días esta semana pero no hice ningún comentario.*

¿Cómo sería un 3? *Me di cuenta que mi hijo hizo la cama todos los días esta semana pero no hice ningún comentario.*

¿Cómo sería un 4? *Me di cuenta que mi hijo hizo la cama por lo menos una vez esta semana y le escribí una nota alentándolo pero no se la entregué.*

¿Cómo sería un 5? *Me di cuenta que mi hijo hizo la cama por lo menos una vez esta semana y le dejé una nota alentándolo en esa misma semana.*

¿Cómo sería un 6? *Me di cuenta que mi hijo hizo la cama por lo menos una vez esta semana y le dejé una nota alentándolo ese mismo día.*

¿Cómo sería un 7? *Me di cuenta que mi hijo hizo la cama por lo menos un día esta semana y le dejé una nota alentándolo, lo felicité verbalmente y lo abracé esa misma semana.*

¿Cómo sería un 8? *Me di cuenta que mi hijo hizo la cama por lo menos una vez esta semana y le dejé una nota alentándolo, lo felicité verbalmente y lo abracé el mismo día.*

¿Cómo sería un 9? *Me di cuenta que mi hijo hizo la cama por lo menos dos veces esta semana y le dejé una nota alentándolo, lo felicité verbalmente y lo abracé esa misma semana.*

¿Cómo sería un 10? *Me di cuenta que mi hijo hizo la cama por lo menos dos veces esta semana y le dejé una nota alentándolo, lo felicité verbalmente y lo abracé el mismo día.*

En los próximos 7 días, ¿qué puedo hacer para moverme medio punto hacia arriba en esta escala?

*Ahora mismo, estoy en el punto 3. Para alcanzar el 3 y medio pondría un bolígrafo y un bloc de notas en su habitación para poder escribir inmediatamente una nota alentadora en cuanto me dé cuenta de que la cama está hecha.*

### Práctica: Objetivos y Soluciones

Como familia, piensen en un desafío al que estén enfrentándose actualmente. Idealmente, el desafío debería ser uno que involucre a todos los miembros de la familia de alguna manera y no un desafío que pueda generar un conflicto mayor en la familia.

✓ Desafío: \_\_\_\_\_

✓ Lo que quiere que pase en su lugar: \_\_\_\_\_

✓ Objetivo BAMS: \_\_\_\_\_

✓ Posibles soluciones:

1. \_\_\_\_\_ 6. \_\_\_\_\_

2. \_\_\_\_\_ 7. \_\_\_\_\_

3. \_\_\_\_\_ 8. \_\_\_\_\_

4. \_\_\_\_\_ 9. \_\_\_\_\_

5. \_\_\_\_\_ 10. \_\_\_\_\_

Evalúe las posibles soluciones (para empezar, elija dos posibles soluciones para evaluar).

**Solución N°1:** \_\_\_\_\_

Pros: \_\_\_\_\_

\_\_\_\_\_

\_\_\_\_\_

Contras: \_\_\_\_\_

\_\_\_\_\_

\_\_\_\_\_

**Solución N°2:** \_\_\_\_\_

Pros: \_\_\_\_\_  
\_\_\_\_\_  
\_\_\_\_\_

Contras: \_\_\_\_\_  
\_\_\_\_\_  
\_\_\_\_\_

✓ Elija una solución: \_\_\_\_\_

✓ Siga su progreso:

En una escala del 1(en absoluto) al 10 (completamente), ¿cuánto he alcanzado mi objetivo hasta el momento presente?:

1            2            3            4            5            6            7            8            9            10

### Tarea para Realizar en el Hogar: Objetivos y Soluciones

Para la siguiente sesión, piense sobre un problema que esté teniendo actualmente. Brevemente, resuma el problema a continuación y complete el ejercicio.

✓ Desafío: \_\_\_\_\_

✓ Lo que quieres que pase en su lugar: \_\_\_\_\_

✓ Objetivo BAMS: \_\_\_\_\_

✓ Posibles soluciones:

1. \_\_\_\_\_ 6. \_\_\_\_\_

2. \_\_\_\_\_ 7. \_\_\_\_\_

3. \_\_\_\_\_ 8. \_\_\_\_\_

4. \_\_\_\_\_ 9. \_\_\_\_\_

5. \_\_\_\_\_ 10. \_\_\_\_\_

✓ Evalúa dos posibles soluciones:

**Solución N°1:** \_\_\_\_\_

Pros: \_\_\_\_\_

\_\_\_\_\_

\_\_\_\_\_

Contras: \_\_\_\_\_

\_\_\_\_\_

\_\_\_\_\_

**Solución N°2:** \_\_\_\_\_

Pros:

|       |       |
|-------|-------|
| _____ | _____ |
| _____ | _____ |
| _____ | _____ |

Contras:

|       |       |
|-------|-------|
| _____ | _____ |
| _____ | _____ |
| _____ | _____ |

✓ Elije una solución: \_\_\_\_\_

✓ Evalúe su progreso:

En una escala del 1(en absoluto) al 10 (completamente), ¿cuánto he alcanzado mi objetivo hasta el momento presente?:

1            2            3            4            5            6            7            8            9            10

## Sesión Siete

### *Establecimiento de Límites*

#### Materiales

- ✓ Hoja de trabajo.
- ✓ Formulario de tareas para realizar en el hogar.
- ✓ Cuaderno de notas y bolígrafo para tomar notas sobre las respuestas de los participantes.
- ✓ Hojas de papel para que los participantes dibujen y escriban.

#### Resumen

Los objetivos de esta sesión son entender la importancia de externalizar los problemas y aprender cómo establecer y construir límites claros para mejorar el funcionamiento individual y familiar.

#### Índice del plan de trabajo

| Contenido                                                         | Duración Sugerida<br>(Total 90 minutos) |
|-------------------------------------------------------------------|-----------------------------------------|
| 1. Exposición de la frase                                         | 5 minutos                               |
| 2. Revisión de la tarea para realizar en el hogar                 | 15 minutos                              |
| 3. Externalización del problema                                   | 30 minutos                              |
| 4. Crear límites apropiados                                       | 25 minutos                              |
| 5. Importancia del autocuidado                                    | 10 minutos                              |
| 6. Asignación y explicación de la tarea para realizar en el hogar | 5 minutos                               |

#### 1. Exposición de la Frase (5 minutos)

Diga, “*Tal como hicimos la semana pasada, comenzaremos esta sesión reflexionando sobre una frase importante.*” Entregue a cada participante una copia de la frase y diga, “Por favor, lean la siguiente frase”. Permítales suficiente tiempo para hacerlo.

Saber alejarse y acercarse es la clave de cualquier relación duradera.

—Doménico Cieri Estrada

Explique, “*Ahora quisiera que reflexionen sobre lo que esta frase significa para ustedes y la manera como ésta es relevante para su situación.*” En este punto, quien quiera que desee hablar puede hacerlo.

Verifique si las personas que no hayan respondido tienen algo que agregar. Prosiga: “*Es importante tener límites claros en las relaciones con los demás. Conocer la forma de establecer límites claros es una de las claves para tener relaciones familiares duraderas.*”

#### 2. Revisión de la tarea para realizar en el hogar (15 minutos)

Diga, “*La última vez que nos vimos, les pedí que pensarán en un reto que estén afrontando. Luego, les pedí que trataran de practicar la traducción del discurso problemático en discurso de soluciones, seguido de una meta BAMS y de una lluvia de ideas de soluciones posibles. Tengo mucho interés en escuchar acerca de sus experiencias y de las reflexiones que han generado.*” En este punto, quien sea que quiera hablar puede hacerlo. Verifique si las personas que no respondieron tienen algo que añadir. También pregunte cosas como “¿Qué hizo para manejar esto?”. Además, cuando la persona con LM/TCE y/o el familiar expliquen la forma mediante la cual superaron los retos asociados a la condición, exprese sorpresa diciendo cosas como “¡Qué bueno!”

#### 3. Externalización del problema (25 minutos)

Señale: “*Una de las razones por las cuales ustedes encontraron tanto éxito mediante la técnica “Habla-nte-Escucha” es que el foco está centrado en los pensamientos y los comportamientos, lo cual reduce la probabilidad de que la culpa y la actitud defensiva se interpongan en el camino para lograr sus objetivos. En la sesión anterior, les pedí que emplearan el discurso de resolución de problemas tanto como les fuera posible; sin embargo, hay ocasiones en las cuales ustedes necesitan hablar del problema. Tal como lo discutimos la semana pasada, hablar de un problema como si estuviera fuertemente enraizado al interior de un individuo puede resultar de poca ayuda. Esto incluye decir cosas como <<Él está deprimido>>, en vez de <<Él se siente deprimido>> Decir que alguien está deprimido sugiere que la depresión es un estado permanente, mientras que decir que alguien tiene depresión o que se siente deprimido indica que él o ella es*

*primeramente una persona que está experimentando un estado temporal de depresión. Tales afirmaciones crean posibilidades más amplias de soluciones porque sugieren que el estado de este individuo puede cambiar. También ayudan al individuo en la medida que implican que el individuo tiene cierto grado de posesión o control sobre su condición.”*

Continúe, “Entonces, a veces es benéfico externalizar el problema. Cuando se externaliza el problema, se piensa en él, se habla de él y se intenta resolver la situación problemática como algo independiente, algo que se encuentra fuera del individuo. El primer paso en este proceso involucra darle un nombre al problema e ilustrarlo gráficamente. Entonces, me pregunto si pueden hablarme de un problema que esté generando un impacto en su familia y que esté relacionado con la LM/TCE. Puede ser el mismo que usaron en sus ejercicios de la semana pasada.”

**Nota:** Debe permitir a todos el espacio para hablar. Asista a la familia para llegar a un consenso acerca de qué problema utilizar en este ejercicio.

Diga, “Ahora, quisiera que ustedes le dieran un nombre a este problema. Puede ser algo que suene como el problema, por ejemplo: si los síntomas de la artritis representan un reto importante para la familia, se pueden referir al problema como “Arti”. También es posible nombrar al problema con algo que no guarda ninguna relación con la enfermedad. El problema puede ser nombrado de cualquier forma, sólo es importante que todos ustedes sepan lo que significa.” Permita el tiempo necesario a los participantes para pensar en un nombre por sí mismos.

Solicite: “Ahora, quiero que dibujen (diga el nombre del problema que la familia ha elegido compartir) en esta hoja de papel. Por favor, tómese el tiempo para hablar de sus respuestas a las preguntas en esta hoja de trabajo.” Entregue a los participantes la hoja de trabajo titulada “Preguntas de Externalización” y proporcione una cantidad de tiempo suficiente para completar la hoja de trabajo. Anime a los participantes a interactuar mientras completan el dibujo.

Exponga: “Al centrarse en los problemas como retos a superar y no como si estuvieran localizados dentro de los individuos, se crea una distancia entre las personas y los problemas. Esta exteriorización del

*problema hace que sea más fácil investigar y evaluar la influencia del problema en el funcionamiento individual y familiar, además permite a las personas unirse para superar el problema. En su familia, (mencionar el problema) puede hacer su vida difícil. Le corresponde a cada uno de ustedes trabajar juntos para no permitir que esto suceda.”*

#### **4. Crear límites apropiados (20 minutos)**

Entregue a los participantes la hoja de trabajo titulada “Los Límites Familiares.” Diga: “Considerando que es importante crear una separación clara entre el problema y el individuo, como se discutió hace unos minutos, también es importante crear un apropiado nivel de separación entre los miembros de la familia. Explicaremos algunos conceptos primero: Las familias son sistemas compuestos de subsistemas, que incluyen individuos y grupos de individuos, como por ejemplo subsistemas de padre/cónyuge, hermanos, y diadas padre-hijo. Los individuos y los subsistemas están diferenciados por límites, que son las barreras invisibles que les rodean y regulan el contacto que se tiene con los demás. En las interacciones entre el sistema completo y los subsistemas podemos identificar ciertas secuencias de interacción que se repiten, lo que puede crear patrones duraderos o reglas no habladas que determinan cómo, cuándo y con cuáles de los miembros de la familia se relacionan.”

Explique: “Los límites se describen en un continuo que va desde el extremo rigidez hasta difuso. En uno de los extremos del continuo, se encuentran los límites rígidos que tienen bajos niveles de conexión y poca participación en los asuntos familiares. Se caracterizan por tener la comunicación, el apoyo y la capacidad de adaptación limitadas. En cambio en el otro extremo del continuo, se encuentran los límites difusos que implican altos niveles de conexión y una participación excesiva de todos los subsistemas en los problemas familiares, en este tipo de límites los integrantes de la familia están demasiado involucrados en la vida del otro. En este caso, nadie y a la vez todo el mundo se está haciendo cargo.

Diga: “Los límites excesivamente rígidos o difusos hacen que sea difícil para las familias adaptarse eficazmente a una circunstancia compleja, como puede ser una LM/TCE, debido a que el sistema de la

familia, o bien carece de flexibilidad (en el caso de los límites rígidos), o tiene demasiada flexibilidad (en el caso de límites difusos) para permitir el reajuste más adaptativo en cada uno de los subsistemas y en la familia como un sistema completo. Por lo tanto, las familias deben esforzarse por crear límites claros entre los miembros y los subsistemas, y con el entorno a la familia como un todo.”

Explique: “También en relación a los límites, después de una LM/TCE, la familia a veces puede organizarse en torno a la lesión. Es decir, la dinámica de la familia está alterada por factores relacionados con la lesión, tales como la presentación de los síntomas y la administración de medicamentos. De esta manera, la lesión y la persona lesionada toman una gran cantidad de energía de las familias. También, el mensaje que se transmite a veces es que los miembros de la familia no deben hacer o hablar de ciertas cosas relacionadas con la lesión. Además, algunos miembros de la familia podrían llegar a estar excesivamente cerca de otros miembros de la familia, descuidando otras relaciones e incluso su propia salud.

Diga “En estos casos, los límites no son claros debido a que los miembros de la familia no se dan cuenta de la singularidad de los individuos o confunden sus roles. Esto implica que los límites pueden volverse excesivamente rígidos o difusos. Aunque el objetivo es tener un nivel equilibrado de cercanía en las familias, puede ser difícil frente a la LM/TCE.”

Idealmente, los límites deberían ser claros, permitiendo que los miembros de la familia estén cerca uno del otro y manteniendo también un sentido de separación. Las fronteras excesivamente rígidas podrían estrechar las relaciones familiares y limitar el acceso a los miembros de la familia entre sí, mientras que los límites excesivamente difusos pueden llevar a la confusión entre las generaciones. Para que las familias funcionen de la forma más saludable posible, los límites deben ser claros.”

Diga: “También es importante crear límites claros entre los miembros de la familia y otras personas e instituciones debido a que el estigma y los mitos alrededor de algunos de los síntomas provocan que muchas familias que enfrentan una LM/TCE se aíslen. Lo que deriva en que la familia se separe de importantes sistemas de apoyo formales e informales.”

Entregue a los participantes la hoja de trabajo titulada “Dinámica de la Familia No Saludable”. Diga: “Esta hoja de trabajo describe algunas formas en las que las familias pueden organizarse, estas pautas de comportamiento pueden resultar en ocasiones poco útiles. Es posible que alguna de ellas le recuerda a su familia.”

Después de revisar el material, agregue, “Además de hablar sobre las soluciones como discutimos la semana pasada, las alternativas potenciales se pueden poner en acción si las personas comienzan a actuar en otro subsistema o si la naturaleza de su participación cambia en los subsistemas.”

Comente: “Cuando a una familia no le queda claro qué persona pertenece a un determinado subsistema dentro de la familia, se enfrenta a una situación llamada “pérdida ambigua”. Exploremos un poco más este concepto, la familia puede percibir un miembro ausente físicamente y psicológicamente presente, por ejemplo, la familia puede estar sentada a la mesa para la comida y colocar un lugar para un niño que ha sido secuestrado hace tiempo y que no fue localizado. Por otro lado, una familia puede percibir un miembro ausente psicológicamente como físicamente presente; un ejemplo de este caso es el esposo de una persona con una demencia severa que puede pensar que aunque aún se encuentra casado, su esposa es una completa extraña. En ambos casos, la familia no tiene claro a qué subsistema pertenece cada uno de los individuos. En el caso de las LM/TCE, a pesar de que la persona que sufrió la lesión ha sobrevivido e incluso pueda parecer la misma, él o ella podrían actuar de manera muy diferente. Por esta razón, se experimenta una pérdida, pero no en el sentido tradicional.”

Prosiga: “A muchas personas con LM/TCE y a sus familias se les dice que el sobreviviente tiene suerte de estar vivo. Aunque la muerte de un familiar es un evento estresante y doloroso existen procesos sociales y culturales que permiten a las familias vivir la pérdida y seguir adelante. Sin embargo, cuando un miembro de la familia desaparece, como un soldado que desaparece en acción, lo cual es una pérdida física, o una enfermedad severa o una lesión, que es una pérdida psicológica, los miembros de la familia pueden experimentar mucha incertidumbre. Sin una verificación de la pérdida y, en consecuencia, sin una verificación de los procesos familiares o

*de la pertenencia social, una pérdida ambigua sin resolver crea una condición de ambigüedad de los límites dentro del sistema familiar. Por esta razón, las familias pueden encontrar extremadamente difícil trabajar el dolor de su pérdida porque no son capaces de replantear y modificar sus límites. Como resultado, en algunas ocasiones los familiares pueden llegar a estar paralizados, no tener la capacidad para resolver y no sanar.*

Diga: “Basándose en observaciones clínicas y de investigación, a menudo hay una percepción familiar abierta o encubiertamente acordada de quién está dentro y quién está fuera de la familia. Sin embargo, a veces los individuos percibirán la pertenencia de los miembros de la familia y los límites de manera diferente.”

### **5. Importancia del autocuidado (10 minutos)**

Exponga, “Como hemos comentado, a veces los individuos en las familias que enfrentan una LM/TCE pueden llegar a estar excesivamente involucrados en la vida del otro. Esto puede ser

*especialmente cierto entre los cuidadores y los sobrevivientes de una LM/TCE. Aunque los cuidadores a menudo tienen que dedicar una gran cantidad de tiempo y esfuerzo para ayudar a su familiar con LM/TCE, es importante que recuerden que deben participar en actividades que ellos disfrutan y cuidar de su salud física y mental.”* Dé a los participantes la hoja de trabajo titulada “Actividades de Autocuidado”.

### **6. Explicación de la tarea para realizar en el hogar (5 minutos)**

Concluya la sesión agradeciendo a los asistentes por su compromiso y participación. Distribuya la hoja de tarea para realizar en el hogar y proponga, “Me gustaría que usted seleccione una actividad de la lista para su autocuidado y que se tome el tiempo a partir de este momento y hasta la próxima vez que nos reunamos para desarrollarla”.

Al final de cada sesión por favor tome 2 minutos para preguntar a los participantes si ha cambiado el sentido de la frase.

*Saber y acercarse es la clave de cualquier relación duradera.*

—Doménico Cieri Estrada

### Preguntas de Externalización

Estas preguntas están destinadas a ayudarle a iniciar el proceso de externalización del problema. Escriba el nombre del problema que surgió en el espacio en blanco.

1. ¿A qué se parece \_\_\_\_\_?

---

2. ¿Cuándo \_\_\_\_\_ aparece?

---

3. ¿Con quién pasa \_\_\_\_\_ el tiempo?

---

4. ¿Cuándo fue capaz de resistir la influencia de \_\_\_\_\_?

---

### Límites Familiares

Cuando ciertas secuencias de interacción se repiten, se pueden crear patrones duraderos o reglas secretas que determinan cómo, cuándo y con quién se relacionan los miembros de la familia. Las familias se componen de subsistemas, los cuales incluyen individuos y grupos de individuos, como padre/cónyuge, hermano y díadas padre-hijo. Los individuos y subsistemas están demarcados por límites interpersonales, que son barreras invisibles que los rodean y regulan la cantidad de contacto con otros.

Los límites se describen en una serie continua que va desde rígidos hasta difusos. Los límites rígidos implican la separación entre los miembros de la familia o subsistemas. Se caracterizan por una limitada comunicación, apoyo y capacidad de adaptación. Límites difusos implican enredos. Es decir, los miembros de la familia están demasiado involucrados en la vida del otro. En estos casos, nadie y todo el mundo se está haciendo cargo. Por otra parte, la orientación eficaz en tiempos de cambio es rara.

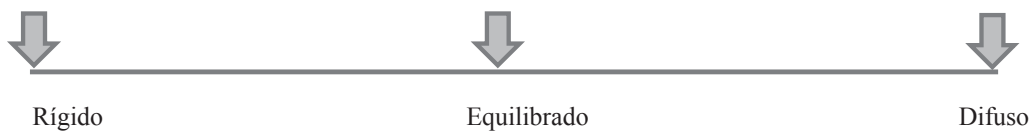

Los límites excesivamente rígidos o difusos hacen que sea difícil para las familias alcanzar una adaptación óptima debido a que el sistema de la familia o bien carece de flexibilidad (en el caso de los límites rígidos) o tiene demasiada flexibilidad (en el caso de límites difusos) para permitir el reajuste exitoso de todos los miembros de la familia. Por lo tanto, las familias deben esforzarse por crear límites claros entre los miembros y los subsistemas y en torno a la familia como un todo.

Los límites son recíprocos. Es decir, si una persona está en una relación que se caracteriza por límites difusos, esto generalmente significa que la persona misma está en otra relación que se caracteriza por límites rígidos. **Las alternativas potenciales pueden ponerse en práctica si las personas comienzan a actuar en otro subsistema o si la naturaleza de su participación cambia para unos en los subsistemas.**

## Dinámica Familiar no saludable

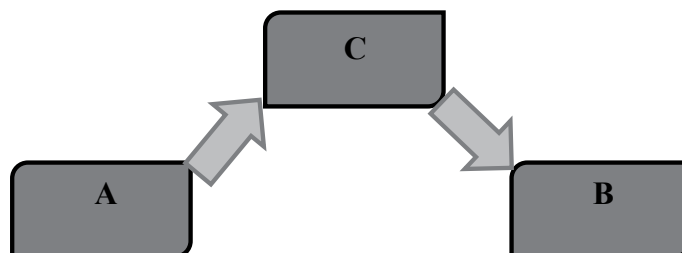

La **triangulación** se produce cuando dos personas traen una tercera persona a la relación para mantener la estabilidad y evitar hacer frente a un problema. Esto suele ocurrir en momentos de estrés durante los cuales para las dos personas provoca demasiada ansiedad el hecho que puedan comunicarse directamente.

Mirando el diagrama anterior, imagine que a la persona A le molesta que la persona B siga tomando prestadas sus cosas sin pedir permiso primero. En lugar de utilizar una afirmación YO para expresar su queja directamente a la persona B de una manera útil, la persona A se queja con la persona C. En este escenario, una persona A se siente mejor después de la descarga, pero la persona C está algo incómoda porque está ahora atrapada en el medio. La persona B no es consciente de que sus acciones son problemáticas.

Desviarse y las coaliciones son dos tipos de triangulación descritos por Salvador Minuchin, un terapeuta familiar famoso.

Desviarse ocurre cuando dos personas, en lugar de dirigir la ira o la crítica hacia la otra, centran la negatividad en una tercera persona. Por ejemplo, en un intento de evitar hacer frente a sus problemas matrimoniales, dos padres podrían concentrar su atención en las dificultades académicas de sus hijos, a pesar de que su maestro ha dicho que está funcionando adecuadamente en la escuela. El conflicto entre padres e hijos sirve para distraer la atención de la tensión en su matrimonio, estabilizando el sistema familiar. El niño puede entonces llegar a ser identificado como el miembro problemático de la familia.

Las coaliciones se desarrollan cuando una o dos personas en una relación tratan de obtener el apoyo de una tercera persona en contra de la otra. También existe cuando un miembro de la familia responde a las necesidades del otro miembro de la familia con excesivo cuidado y devoción (*esmero*), mientras que otro miembro de la familia se retira y se vuelve menos sensible. En esta situación, la atención a los miembros de la familia es de apoyo, en lugar de crítica o conflictiva.

El **límite emocional** se refiere a una forma extrema de distanciamiento que representa un intento de resolver los apegos emocionales mediante la eliminación de uno mismo del sistema emocional. Como resultado, la persona sigue siendo reactiva y tiende a tomar decisiones que están excesivamente influenciadas por las emociones y la ansiedad.

**Actividades de Autocuidado**

Para que tengan la capacidad física, mental y emocional para superar los desafíos asociados con la LM/TCE y para mantener los límites claros en la familia, es importante que puedan participar en actividades que promuevan su propio bienestar. Recuerden, cuando ustedes hacen cosas para cuidar de ustedes mismos, de manera indirecta están contribuyendo al cuidado de los miembros de su familia también.

La siguiente es una lista de las cosas que puedo hacer para cuidar de mí mismo:

1. \_\_\_\_\_
2. \_\_\_\_\_
3. \_\_\_\_\_
4. \_\_\_\_\_
5. \_\_\_\_\_
6. \_\_\_\_\_
7. \_\_\_\_\_
8. \_\_\_\_\_
9. \_\_\_\_\_
10. \_\_\_\_\_

## Sesión Ocho

### Cierre y fin del tratamiento

#### Materiales

- ✓ Paquete de las medidas pos-intervención.
- ✓ Panfletos.
- ✓ Libreta de notas y bolígrafo para tomar notas sobre las respuestas de los participantes.

#### Resumen

El objetivo de esta sesión es resumir las habilidades que los participantes han aprendido, administrar de nuevo los cuestionarios psicosociales y obtener los comentarios sobre la intervención.

#### Índice del plan de trabajo

| Contenido                                     | Duración Sugerida<br>(Total 90 minutos) |
|-----------------------------------------------|-----------------------------------------|
| 1. Exposición de la frase                     | 5 minutos                               |
| 2. Revisar la tarea para realizar en el hogar | 5 minutos                               |
| 3. Resumir lo aprendido y hacer comentarios   | 5 minutos                               |
| 4. Completar los cuestionarios psicosociales  | 75 minutos                              |

#### 1. Exposición de la frase (5 minutos)

Diga, *“De la misma manera que hicimos la semana pasada, comenzaremos esta sesión con una reflexión sobre una frase pertinente al tema a debatir.”* Entregue a cada participante una copia de la frase e indíqueles que la lean. Permita el tiempo suficiente para la lectura.

Para que los cambios tengan un valor verdadero deben ser consistentes y duraderos.

—Anthony Robbins

Expresé: *“Me gustaría que reflexionen sobre lo que esta frase significa para ustedes y cómo puede relacionarse con su situación.”* En este momento cualquiera que desee hablar puede hacerlo. Verifique si las personas que no hayan respondido tienen algo que agregar. Explique, *“Esta frase enfatiza la importancia de practicar, practicar, practicar. Ustedes han aprendido muchas técnicas y herramientas valiosas y han hecho cambios en sus*

*familias. Para que estos cambios continúen siendo valiosos, se necesita que sean consistentes y que se apliquen por un largo período de tiempo.”*

#### 1. Revisar la tarea (5 minutos)

Expresé: *“La última vez que nos reunimos, les pedí que seleccionaran una actividad de la lista de auto-cuidado y se tomaran el tiempo suficiente para hacerlo. ¿Cómo les resultó?”* En este momento cualquiera que quiera hablar puede hacerlo. Verifique si las personas que no hayan respondido tienen algo que agregar. Tome nota de las respuestas. Además, haga preguntas tales como: *“¿Cómo lo hizo?”* Asimismo, cuando un individuo que sufre una LM/TCE y/o los miembros de su familia dialoguen sobre la manera en la que superaron los desafíos que les impone su afección, exprese sorpresa expresando *“¡Qué bien!”* Si alguno no completa la tarea, averigüe sus razones usando preguntas tales como *“¿Qué fue lo que impidió hacer la tarea?”*

#### 2. Resumiendo ¿Qué hemos aprendido? (5 minutos)

Explique: *“Como ustedes saben, esta es nuestra última sesión. Nos hemos reunido 7 veces con anterioridad para debatir los problemas que han tenido que enfrentar y han comenzado a usar las nuevas herramientas que ahora tienen a su disposición para ser su propio terapeuta y poder manejar, de mejor manera, los problemas que puedan surgir en el futuro. No esperamos que no existan más dificultades, pero aprendiendo a manejar diferentes problemas, ustedes tienen herramientas que se pueden aplicar a otro tipo de contrariedades que puedan enfrentar en el futuro. En nuestras sesiones, hemos cubierto temas tales como el significado de los acontecimientos en sus vidas, de cómo los pensamientos influyen en las emociones, cómo manejar sus sentimientos, cómo mejorar la comunicación para que sea más efectiva, cómo resolver problemas y cómo manejar las relaciones. ¿Qué han aprendido?”* En este punto, trate de obtener información de cada miembro para que comparta algo que haya aprendido o cómo han cambiado como consecuencia de la intervención. Si les cuesta mucho a los miembros tener una respuesta, ayudaría tener ideas que

usted pueda proponer. Los ejemplos (si se puede aplicar) pueden incluir sus observaciones sobre la comunicación actual entre los miembros de la familia, de cómo los ha visto trabajar sus problemas de una manera más efectiva, de los cambios positivos que han realizado en la relación familiar, del trabajo duro que han hecho para completar la tarea, etc.

Cierre el grupo diciendo: *“Estoy muy contento de ver el progreso que han hecho. Han trabajado mucho y recuerden que cuanto más practiquen estas herramientas en sus casas, más rápidamente se convertirán en un hábito nuevo para ustedes.”*

### **3. Completar el cuestionario psicosocial (75 minutos)**

Indique: *“Ahora para poder medir objetivamente los cambios producidos, les pedimos que completen los mismos cuestionarios que completaron el primer día que llegaron. Les daremos el resto de la sesión del día de hoy para que tengan tiempo de completarlos.”* Distribuya los paquetes de cuestionarios, asegurándose que cada participante recibe el paquete indicado si es un paciente con LM/TCE o un miembro de la familia.

Tan pronto los cuestionarios hayan sido recogidos, los miembros del grupo pueden

marcharse. Para finalizar, despídase diciendo: *“Les reitero, han realizado un trabajo muy bueno, han aprendido muchas técnicas y han trabajado mucho para practicarlas. Esta es la última vez que nos reuniremos, pero no es el final de la recuperación como familia. Los problemas que tienen ahora pueden perdurar, además pueden surgir nuevos problemas, pero ahora tienen las herramientas que les permitirán manejarlos mejor. Continuando la práctica de estas técnicas cada día, ustedes podrán mantener su progreso y continuar mejorando.”* El facilitador debe haber desarrollado una hoja de trabajo para todos los participantes con una lista de los recursos comunitarios existentes (ej. Asociaciones de LM/TCE locales, grupos de apoyo, servicios de orientación para pacientes ambulatorios, etc.). Distribuya las hojas de trabajo informando: *“Aquí hay recursos adicionales que pueden usar en caso que pueda aparecer algún inconveniente en el futuro que ustedes sientan que necesitan apoyo adicional. Así, ustedes se van con un arsenal de herramientas y recursos para continuar creciendo juntos como una familia. Ha sido un placer trabajar con ustedes y ver el progreso que han hecho y les deseamos todo lo mejor en el futuro.”*

Al final de cada sesión por favor tome 2 minutos para preguntar a los participantes si ha cambiado el sentido de la frase.

*Para que los cambios tengan un valor verdadero deben ser consistentes y duraderos.*

—Anthony Robbins
